1 **Metabolic Reprogramming via targeting ACOD1 promotes polarization**  
2 **and anti-tumor activity of human CAR-iMACs in solid tumors**

3

4 Xudong Wang<sup>1,10</sup>, Siyu Su<sup>2,3,10</sup>, Yuqing Zhu<sup>1,4</sup>, Xiaolong Cheng<sup>5,6</sup>, Chen Cheng<sup>1</sup>, Leilei  
5 Chen<sup>7</sup>, Anhua Lei<sup>1,8</sup>, Li Zhang<sup>1</sup>, Yuyan Xu<sup>1</sup>, Wei Li<sup>5,6</sup>, Yi Zhang<sup>3</sup>, Dan Ye<sup>7,9</sup>, Jin  
6 Zhang<sup>1,2,\*</sup>.

7

8 <sup>1</sup>Center for Stem Cell and Regenerative Medicine, Department of Basic Medical  
9 Sciences, and Bone Marrow for Transplantation Center of the First Affiliated Hospital;  
10 Zhejiang University School of Medicine, Hangzhou, 310058, China;

11 <sup>2</sup>Zhejiang Laboratory for Systems & Precision Medicine, Zhejiang University Medical  
12 Center; Hangzhou, Zhejiang Province, 311121, China;

13 <sup>3</sup>Quanzhou First Hospital Affiliated to Fujian Medical University, Quanzhou 362000,  
14 China;

15 <sup>4</sup>Center for Stem Cell and Translational Medicine, School of Life Sciences, Anhui  
16 University, Hefei, Anhui 230601, P.R. China

17 <sup>5</sup>Center for Genetic Medicine Research, Children's National Hospital, 111 Michigan  
18 Ave NW, Washington, DC, 20010, USA;

19 <sup>6</sup>Department of Genomics and Precision Medicine, George Washington University, 111  
20 Michigan Ave NW, Washington, DC, 20010, USA;

21 <sup>7</sup>Shanghai Key Laboratory of Clinical Geriatric Medicine, Shanghai, Huadong Hospital,  
22 and Shanghai Key laboratory of Medical Epigenetics, International Co-laboratory of  
23 Medical Epigenetics and Metabolism (Ministry of Science and Technology), and  
24 Molecular and Cell Biology Lab, Institutes of Biomedical Sciences, Shanghai Medical  
25 College of Fudan University, Shanghai, 200032, China;

26 <sup>8</sup>CellOrigin Inc., Hangzhou, China

27 <sup>9</sup>Department of General Surgery, Huashan Hospital, Fudan University, Shanghai  
28 200040, China;

29 <sup>10</sup>These authors contributed equally: Xudong Wang, Siyu Su

30 \*Correspondence: zhgene@zju.edu.cn

31

32 **Abstract**

33 The pro-inflammatory state of macrophages is crucial in conferring its role in combating  
34 tumor cells. That state is closely associated with metabolic reprogramming. Here we  
35 identified key metabolic genes regulating macrophage pro-inflammatory activation in  
36 a pooled metabolic gene knockout CRISPR screen. We found that *KEAP1* and *ACOD1*  
37 are strong regulators of the pro-inflammatory state, and therefore developed human  
38 *ACOD1* knockout macrophages with our induced pluripotent stem cell-derived CAR-  
39 macrophage (CAR-iMAC) platform. The engineered iMACs showed stronger and more

40 persistent polarization toward the pro-inflammatory state, more ROS production, and  
41 more potent phagocytosis and cytotoxic functions against cancer cells *in vitro*. Upon  
42 transplantation to ovarian or pancreatic cancer mouse models, *ACOD1* depleted CAR-  
43 iMACs exhibited enhanced capacity in repressing tumors *in vivo* and prolonged the  
44 lifespan of mice. In addition, combining *ACOD1*-depleted CAR-iMACs with immune  
45 check point inhibitors (ICIs), such as the anti-CD47 antibody or anti-PD1 antibody  
46 resulted in stronger tumor suppressing effect. Mechanistically, the depletion of *ACOD1*  
47 reduced the immunometabolite itaconate, allowing KEAP1 to prevent NRF2 from  
48 entering the nucleus to activate the anti-inflammatory program. This study  
49 demonstrates that *ACOD1* is a new myeloid target for cancer immunotherapy and  
50 metabolically engineered human iPSC-derived CAR-iMACs exhibit enhanced  
51 polarization and anti-tumor functions in adoptive cell transfer therapies.

52

## 53 **Introduction**

54 Macrophages serve as the first line of host defense and play a key role in innate  
55 immunity. The primary function of macrophages is phagocytosis and microbial killing<sup>1</sup>.  
56 They also participate in a variety of physiological and pathological processes such as  
57 development, inflammation and tumorigenesis. Macrophages can be generally defined  
58 into two highly plastic states: LPS and IFN- $\gamma$ -activated pro-inflammatory macrophages  
59 (M1-like macrophages) and IL-4 or IL-10 induced alternatively activated macrophages  
60 (M2-like macrophages)<sup>2</sup>. Recent studies revealed different metabolic pathways are  
61 closely associated with the different states. Pro-inflammatory macrophages mainly rely  
62 on glycolysis, exhibit the impaired tricarboxylic acid (TCA) cycle and express the  
63 Inducible Nitric Oxide Synthase (iNOS), whereas alternatively activated macrophages  
64 mainly rely on mitochondrial oxidative phosphorylation (OXPHOS)<sup>3</sup>.

65

66 Macrophages are highly plastic cells that can adapt to their surrounding environment.  
67 Pro-inflammatory M1-like macrophages play a crucial role in responding to viruses and  
68 bacteria infection and participate in anti-tumor immunity<sup>4</sup>, whereas M2-like  
69 macrophages can contribute to tumor progression<sup>4</sup>. Tumors can recruit and reprogram

70 macrophages to become the M2-like tumor-associated macrophages (TAMs). TAMs  
71 suppress endogenous cytotoxic T cells, secrete chemokines to recruit Treg cells<sup>5</sup>, and  
72 secrete factors such as VEGF and matrix metalloproteinase enzymes to remodel the  
73 TME, promoting tumor angiogenesis and metastasis<sup>6</sup>. Thus, a primary goal of  
74 macrophage-based cancer immunotherapy is to reduce anti-inflammatory  
75 macrophages and increase pro-inflammatory macrophages.

76 One of the strategies targeting macrophages is to inhibit TAMs *in situ* in the TME. For  
77 instance, an inhibitor of the CSF-1 receptor (CSF-1R) could significantly reduce TAMs  
78 and block glioma progression in a mouse model<sup>7</sup>. An alternative strategy is to modify  
79 macrophages *ex vivo* through genetically engineered monocytes and macrophages,  
80 and the engineered macrophages can be adoptively transferred to tumor-carrying mice.  
81 A modified lentiviral vector, Vpx-LV<sup>8</sup>, and chimeric adenoviral vector Ad5f35<sup>9</sup> were used  
82 to efficiently transduce primary monocytes and macrophages. We developed the iPSC-  
83 derived engineered CAR-macrophage (CAR-iMAC), which may become a powerful  
84 source of engineered macrophage for immunotherapy due to its ease of engineering  
85 and adequate supply. We also demonstrated antigen-dependent anti-tumor functions  
86 when challenged with antigen-expressing cancer cells *in vitro* and *in vivo*<sup>10</sup>. However,  
87 the first generation of CAR-iMACs was not designed to assume a pro-inflammatory  
88 state, necessitating further engineering in this direction. In this study, we first used  
89 pooled CRISPR-Cas9 screens to identify the metabolic regulators of macrophage pro-  
90 inflammatory activation. Our screen revealed that the ACOD1/KEAP1/NRF2 pathway  
91 regulates cellular metabolism and pro-inflammatory activity of macrophages. Moreover,  
92 ACOD1 depleted iMACs or CAR-iMACs are superior in comparison to the unmodified  
93 ones in cancer immunotherapies because of their enhanced *in vitro* and *in vivo* anti-  
94 tumor functions. Therefore, the present work highlights a new myeloid target in cancer  
95 immunotherapy and provides novel engineering strategies for adoptive cell transfer  
96 therapies using metabolically rewired CAR-macrophages.

97

## 98 **Results**

### 99 **A CRISPR screen identified KEAP1 deletion abrogated LPS and IFN- $\gamma$ induced**

## 100 **pro-inflammatory activation of macrophages**

101 To identify the possible genes influencing macrophage pro-inflammatory activation, we  
102 designed a CRISPR screen<sup>11</sup> using a human metabolic sgRNA library containing  
103 metabolism-related transcription factors, small molecule transporters, and metabolic  
104 enzymes in a Cas9-expressing lentiviral vector<sup>12</sup>. The THP-1 cell line is a convenient  
105 system for studying human macrophages *in vitro*, as the THP-1 cells could be induced  
106 into macrophages (tMACs) by PMA stimulation (Extended Data Fig. 1a) and could be  
107 further activated towards pro-inflammatory macrophages after LPS and IFN- $\gamma$   
108 stimulation (Extended Data Fig. 1b). No significant differences in the pro-inflammatory  
109 activation capacity were found between WT and the sgRNA library virus transduced  
110 THP-1 cells (Extended Data Fig. 1c). After transduction and selection, THP-1 cells  
111 were differentiated into macrophages and stimulated with LPS and IFN- $\gamma$  for 24 h.  
112 CD80-high and CD80-low populations were sorted using flow cytometry. Top ranking  
113 candidate genes enriched in the two populations were unraveled using deep  
114 sequencing (Fig. 1a). GO analysis revealed that in the CD80-high population,  
115 sgRNAs/genes related to NAD activity, hypoxia, and amino acid transporter were  
116 enriched, whereas in the CD80-low population, sgRNAs/genes related to reactive  
117 oxygen species, glycosaminoglycan biosynthesis, and glycolysis were enriched  
118 (Extended Data Fig. 1d). The screen results were also visualized with a volcano plot,  
119 which revealed that the sgRNAs targeting *KEAP1* was significantly enriched in the  
120 CD80-low population (Fig. 1b), and sgRNA counts of *KEAP1* were significantly higher  
121 in the CD80-low population (Extended Data Fig. 1e). During our screen, sg*NFKB1s*  
122 were also enriched in the CD80-low population (Extended Data Fig. 1f left), which is  
123 consistent with its role in promoting the inflammation program<sup>13</sup>. When *NFKB1* was  
124 deleted in THP-1 cells (Extended Data Fig. 1g), the expression of CD80 was  
125 significantly abrogated in the LPS and IFN- $\gamma$ -induced macrophages (Extended Data  
126 Fig. 1h,i). This demonstrated that the validity of our screen in THP-1 cells was credible.  
127 We subsequently deleted *KEAP1* in THP-1 cells to validate the effect of KEAP1 on  
128 macrophage pro-inflammatory activation. We designed three sgRNAs to target the  
129 human *KEAP1* (Extended Data Fig. 2a) with good efficiency (Extended Data Fig. 2b,c),



130 and the KEAP1 level could be reduced in THP1 cells (Fig. 1c and Extended Data Fig.  
131 2d). To examine activation of the *KEAP1*<sup>-/-</sup> macrophages, we treated tMACs with LPS  
132 and IFN- $\gamma$  for 2, 8, and 24 h. The expression of CD80 is significantly abrogated in  
133 *KEAP1*<sup>-/-</sup> macrophages after 8 and 24 h of stimulation (Fig. 1d,e). The expression of  
134 pro-inflammatory genes was also reduced in *KEAP1*<sup>-/-</sup> macrophages, with the maximal  
135 difference between WT and *KEAP1*<sup>-/-</sup> macrophages observed after 8 h of stimulation  
136 (Fig. 1f). As sg*KEAP1*-3 showed the highest efficiency (Extended Data Fig. 2c,d),  
137 sg*KEAP1*-3 transduced tMACs were used for further analysis. With RNA-seq analysis,  
138 we identified genes related to Toll-like receptor signaling pathway, phagosome, NOD-  
139 like receptor signaling pathway, and NF-kappa B signaling pathway was higher in WT  
140 macrophages after stimulation (Extended Data Fig. 3a), whereas genes related to  
141 Glutathione metabolism and Oxidative phosphorylation was higher in knockout  
142 macrophages with the same stimulation (Extended Data Fig. 3b). Together, these  
143 findings indicate that *KEAP1* deletion inhibits the pro-inflammatory activation of  
144 macrophages.

145 We then tried to examine whether *KEAP1* had the same effects on human iPSC-  
146 derived macrophages. We obtained an iPSC cell line with a 22 bp deletion on the  
147 *KEAP1* gene using the CRISPR-Cas9 technology (Extended Data Fig. 4a). *KEAP1*  
148 protein expression was significantly decreased in the knockout cell line (Extended Data  
149 Fig. 4b). However, *KEAP1* was continuously expressed during the differentiation  
150 process from WT iPSCs to macrophages (Extended Data Fig. 4c), and we could not  
151 obtain differentiated macrophages from the *KEAP1* knockout iPSC line, suggesting  
152 *KEAP1* may be an essential gene in the process of macrophage differentiation.

153

#### 154 ***ACOD1* deletion promoted pro-inflammatory activation in tMACs**

155 The challenge of obtaining *KEAP1*-deleted iMACs enabled us to examine other players  
156 in the pathway. The KEAP1 protein can be modified and regulated via the alkylation of  
157 cysteine by a metabolite called itaconate<sup>14</sup>. Aconitate decarboxylase 1 (encoded by  
158 *ACOD1*) or Immune Responsive Gene 1 (IRG1) is the sole enzyme responsible for  
159 itaconate production and functions as an upstream regulator of KEAP1<sup>15</sup>. The

160 alkylation of KEAP1 allows newly synthesized NRF2 to accumulate, transfer to the  
161 nucleus, and activate the transcription of anti-oxidant genes<sup>16,17</sup>. According to this  
162 mechanism, we speculate *ACOD1* deletion may enhance the pro-inflammatory  
163 activation of macrophages, opposite to what KEAP1 does. Our CRISPR screen in  
164 iPSC-derived macrophages also identified sgRNAs targeting *ACOD1* enriched in the  
165 CD80-high population (Extended Data Fig. 5a). To further investigate the role of  
166 *ACOD1* in human macrophage pro-inflammatory activation, we designed 4 sgRNAs  
167 targeting *ACOD1* (Extended Data Fig. 5b), T7 endonuclease assays revealed that  
168 sgRNA-2 and sgRNA-3 had higher cleavage activity (Extended Data Fig. 5c,d and e).  
169 We then generated *ACOD1*-deleted THP-1 cells in which the mRNA expression was  
170 significantly lower (Fig. 2a), and the protein expression of *ACOD1* was nearly blank in  
171 sg*ACOD1*-2 and sg*ACOD1*-3 THP-1 derived macrophages (Fig. 2b). To reveal the  
172 function of *ACOD1* in pro-inflammatory activation of macrophages, we found CD80  
173 expression was higher in *ACOD1*-deleted macrophages after stimulation and the  
174 magnitude of difference was maintained after two days (Fig. 2c,d). The mRNA  
175 expression of pro-inflammatory genes showed an approximately 2-fold increase in  
176 *ACOD1*-deleted macrophages, such as *IL6* and chemokine genes *CXCL9*, *CXCL10*,  
177 and *CXCL11*, especially after 8 h of stimulation (Fig. 2e). When stimulated by LPS  
178 alone, about a 5-fold increase of CD80 expression could also be detected (Extended  
179 Data Fig. 5f,g). Collectively, these data demonstrate that *ACOD1* deletion promotes  
180 more sustainable pro-inflammatory activation of tMACs following stimulation.

181

### 182 ***ACOD1*-deleted human iMACs demonstrated enhanced pro-inflammatory** 183 **activation**

184 To investigate whether *ACOD1* deletion contributes to pro-inflammatory activation in  
185 human iMACs, we knocked out *ACOD1* in human iPSC using the CRISPR/Cas9  
186 technology with sgRNA-3. A new cell line with an 8 bp deletion on the fourth exon of  
187 the *ACOD1* gene was established (Fig. 3a). Differentiation from this engineered iPSCs  
188 to macrophages was successful, and the purity of macrophages reached to 96% on  
189 day 29 (Extended Data Fig. 6a,b). The deficiency of *ACOD1* in mRNA (Extended Data

190 Fig. 6c) and protein expression (Fig. 3b) was confirmed. As expected, the intracellular  
191 concentration of itaconate (ITA) was also significantly lower in *ACOD1* deficient iMACs  
192 (Fig. 3c). After 24 h of stimulation with LPS or LPS plus IFN- $\gamma$ , the expression of CD80  
193 was significantly higher in *ACOD1*<sup>-/-</sup> iMACs (Fig. 3d,e). We further measured the mRNA  
194 expression of other pro-inflammatory genes to confirm this result. In line with elevated  
195 CD80 expression, pro-inflammatory genes *IL6*, *IL1B*, *IL1A*, *IL23A* and *CXCL-10* were  
196 also significantly higher in *ACOD1*<sup>-/-</sup> iMACs (Extended Data Fig. 6d). We also validated  
197 the changes at the protein level with ELISA. Compared with WT iMACs, *ACOD1*<sup>-/-</sup>  
198 iMACs had increased levels of pro-inflammatory cytokines and chemokines such as  
199 IL-6, IL-1 $\beta$  and CXCL-10 in the supernatant upon LPS and IFN- $\gamma$  stimulation (Fig. 3f).  
200 To extend the finding that *ACOD1* restricted the iMAC pro-inflammatory state and the  
201 associated metabolic program, we measured real-time changes in cellular oxygen  
202 consumption (OCR) in WT and *ACOD1*<sup>-/-</sup> iMACs. *ACOD1* deletion led to a decreased  
203 oxygen consumption rate (OCR) (Fig. 3g), including decreased maximal respiration  
204 capacity (MRC) (Fig. 3h), suggesting a decrease in mitochondrial function typically  
205 associated with the M2-like state in the absence of *ACOD1*. Together, these results  
206 demonstrate that *ACOD1* deletion promotes pro-inflammatory activation of iMACs, and  
207 decreases mitochondrial function upon pro-inflammatory stimulation.

208

209 ***ACOD1*<sup>-/-</sup> iMACs demonstrated a stronger phagocytosis and anti-cancer cell**  
210 **function.**

211 To further investigate the role of *ACOD1* in iMACs in the presence of tumor cells, Nalm6  
212 or K562 cells were used to co-culture with WT iMACs or *ACOD1*<sup>-/-</sup> iMACs. We found  
213 that, after co-culturing with Nalm6 cells for 24 h at an effector: target ratio of 5:1 or 3:1,  
214 the expression levels of M1-like markers CD80 and CD86 were higher in *ACOD1*<sup>-/-</sup>  
215 iMACs, whereas M2-like markers CD163 and CD206 were lower (Fig. 4a and  
216 Extended Data Fig. 7a). Co-culturing with K562 cells had the similar results (Extended  
217 Data Fig. 7b,c). Importantly, a long-term co-culture assay revealed that the expression  
218 of M1-like markers remained elevated, whereas M2-like markers remained lower in  
219 *ACOD1*<sup>-/-</sup> iMACs in three days (Fig. 4b), indicating that *ACOD1* deletion could

220 contribute to a long-term maintenance of higher pro-inflammatory activation and  
221 resistance to conversion toward the anti-inflammatory state in the presence of Nalm6  
222 tumor cells. In addition, mRNA expression of other M1-like marker genes was also  
223 significantly higher in *ACOD1*<sup>-/-</sup> iMACs co-cultured with Nalm6 cells (Fig. 4c and  
224 Extended Data Fig. 7d), and their expression was also maintained higher over long  
225 term co-culturing (Extended Data Fig. 7e). Next, flow cytometry results support the  
226 stronger phagocytosis function of *ACOD1*<sup>-/-</sup> iMACs against tumor cells (Fig. 4d,e). The  
227 isotype control and gating strategy of the phagocytosis assay was shown in Extended  
228 Data Fig. 7f-h. Confocal imaging analysis also showed that *ACOD1*<sup>-/-</sup> iMACs co-  
229 cultured with K562 cells for 24 h had a stronger phagocytosis function (Fig. 4f,g). Finally,  
230 the luciferase assay showed *ACOD1*<sup>-/-</sup> iMACs had higher cytolytic activity against  
231 tumor cells (Fig. 4h). Taken together, the above data demonstrate *ACOD1* deletion  
232 promotes a stronger anti-tumor function upon tumor cell stimulation.

233

### 234 ***ACOD1* deletion decreased the expression of the nuclear NRF2 protein and its** 235 **activity in iMACs**

236 It was demonstrated that itaconate was a crucial anti-inflammatory metabolite that acts  
237 via NRF2<sup>14</sup>. To understand the molecular mechanisms of *ACOD1* depletion in our  
238 iMAC system, we examined NRF2 and its downstream genes in iMACs. We found  
239 mRNA expression of *NRF2* had no significant difference in WT and *ACOD1*<sup>-/-</sup> iMACs  
240 (Fig. 5a). However, the expression of *NRF2* downstream genes decreased significantly  
241 in *ACOD1*<sup>-/-</sup> iMACs, such as *SOD2*, *HMOX1*, *GCLM*, *NQO1*, and *GSR* (Fig. 5b).  
242 Confocal imaging showed that the total NRF2 protein level in the nucleus decreased  
243 significantly in *ACOD1*<sup>-/-</sup> iMACs, especially after LPS and IFN- $\gamma$  stimulation for 2 and 8  
244 h (Fig. 5c, d and Extended Data Fig. 8a-c). One of the NRF2 targets is TNFAIP3 (*A20*)  
245 which is a negative regulator of the NF- $\kappa$ B pathway and macrophage activation<sup>18</sup>. We  
246 measured *A20* expression in iMACs and found that it decreased in *ACOD1*<sup>-/-</sup> iMACs  
247 (Extended Data Fig. 8d), which is likely to mediate increased NF- $\kappa$ B activity. To further  
248 validate the functional effect of NRF2 on macrophage activation, we designed three

249 gRNAs targeting *NRF2* (Extended Data Fig. 9a), which all successfully lowered the  
250 mRNA expression of *NRF2* (Extended Data Fig. 9b). Depletion of *NRF2* recapitulated  
251 *ACOD1* deletion in that CD80 expression was higher in sg*NRF2*s transduced cells  
252 compared to WT controls after LPS and IFN- $\gamma$  stimulation for 24 h (Extended Data Fig.  
253 9c), and consistently mRNA expression of pro-inflammatory genes was also higher  
254 (Extended Data Fig. 9d). Together, these results demonstrate that *ACOD1* deletion  
255 decreased *NRF2* activity to allow pro-inflammatory activation of iMACs.

256

### 257 ***ACOD1* deletion promoted anti-cancer cell activity against solid tumors of CAR-** 258 **iMACs *in vitro* and *in vivo***

259 Adoptive cell therapy with genetically modified immune cells has been established as  
260 a promising approach for cancer treatment. However, applications to solid tumors have  
261 proven challenging. To improve the anti-solid tumor functions of iMACs, we used our  
262 previously established CAR-iMAC system, in which we stably expressed the first  
263 generation of anti-mesothelin (MSLN) CAR with CD3 $\zeta$  as the intracellular domain in  
264 human iPSCs and differentiated them to produce MSLN-CAR-iMACs to kill mesothelin-  
265 expressing ovarian tumors both *in vitro* and *in vivo*<sup>10</sup>. We then performed a detailed  
266 comparison of MSLN-CAR-iMACs and *ACOD1*<sup>-/-</sup> MSLN-CAR-iMACs. *ACOD1*<sup>-/-</sup> MSLN-  
267 CAR-iMACs expressed more pro-inflammatory marker proteins (CD80 and CD86)  
268 after being co-cultured with HO-8910 ovarian cancer cells for 24 h (Fig. 6a,b). Lower  
269 anti-inflammatory marker proteins (CD163 and CD206) were consistently detected in  
270 *ACOD1*<sup>-/-</sup> MSLN-CAR-iMACs (Fig. 6a,b). *In vitro* tumor cell killing assay revealed that  
271 *ACOD1*<sup>-/-</sup> MSLN-CAR-iMACs significantly increased anti-tumor activity (Fig. 6c), which  
272 could be dampened by supplementing a cell permeable 4-Octyl Itaconate (4-OI)<sup>19</sup> (Fig.  
273 6d). To further dissect the downstream signaling related to *NRF2*, a chemical *NRF2*  
274 activator sulforaphane (SFN)<sup>20</sup> was added to the co-culture system, which abrogated  
275 the enhanced capacity in *ACOD1*<sup>-/-</sup> MSLN-CAR-iMACs (Fig. 6e). To examine the  
276 cytolytic mechanisms in addition to phagocytosis, we collected the supernatant from  
277 the co-culture of tumor cells and CAR-iMACs, and then added it to another well of  
278 tumor cells. To our surprise, the supernatant alone had tumor killing function (Fig. 6f),

279 which was not abrogated by neutralizing antibodies of TNF- $\alpha$  and IFN- $\gamma$  (Fig. 6f), two  
280 cytolytic cytokines. Interestingly, compared with MSLN-CAR-iMACs, *ACOD1*<sup>-/-</sup> MSLN-  
281 CAR-iMACs had increased inflammatory cytokines such as IL-6, IL-1 $\beta$  and CXCL-10,  
282 but not TNF- $\alpha$  and IFN- $\gamma$  when co-cultured with HO-8910 cells for 24 h (Fig. 6g). Then  
283 we explored other potential cytolytic factors in the medium. It has been reported that  
284 ROS is produced upon LPS stimulation and through TLR<sup>21</sup>, and it can be dampened  
285 by supplementing itaconate in macrophages<sup>14</sup>. Compared to MSLN-CAR-iMACs, ROS  
286 production was also elevated in *ACOD1*<sup>-/-</sup> MSLN-CAR-iMACs (Extended Data Fig. 10a,  
287 b). To examine the function of ROS in tumor killing ability of *ACOD1*<sup>-/-</sup> MSLN-CAR-  
288 iMACs, we added the anti-oxidant reagent N-Acetyl-L-cysteine (NAC) to eliminate  
289 ROS in the tumor-iMAC co-culture system. The tumor killing capacity of CAR-iMACs  
290 was significantly blocked by NAC (Fig. 6h). This result demonstrated that ROS  
291 contributed to the enhanced tumor killing ability of *ACOD1*<sup>-/-</sup> MSLN-CAR-iMACs.  
292 To evaluate the anti-tumor activity of *ACOD1*<sup>-/-</sup> MSLN-CAR-iMACs *in vivo*, we used two  
293 different xenograft solid tumor models with the NSG mice. In the first model, the mice  
294 were inoculated intraperitoneally (IP) with luciferase-expressing HO-8910 cells. After  
295 four days, the mice received a single IP injection of iMACs (Fig. 6i), and were monitored  
296 by bioluminescent imaging (BLI) afterwards (Fig. 6j). Compared with the untreated or  
297 the MSLN-CAR-iMACs treated mice, treatment with *ACOD1*<sup>-/-</sup> MSLN-CAR-iMACs led  
298 to significant inhibition of tumor growth (Fig. 6k). This improved anti-tumor activity also  
299 led to markedly improved survival time (Fig. 6l). Then we examined the pro-  
300 inflammatory activity of iMACs *in vivo*. iMACs were injected intratumorally, and the pro-  
301 inflammatory markers were significantly elevated in *ACOD1*<sup>-/-</sup> MSLN-CAR-iMACs  
302 compared with unmodified MSLN-CAR-iMACs after injection for 7 days (Extended  
303 Data Fig. 11a, b) or 14 days (Extended Data Fig. 11c, d). These results indicated that  
304 *ACOD1*-depleted CAR-iMACs could keep an enhanced pro-inflammatory activity *in*  
305 *vivo* for at least 14 days.  
306 Consistent results were obtained in another setting of pancreatic cancer. The M1  
307 markers were significantly elevated in *ACOD1*<sup>-/-</sup> MSLN-CAR-iMACs compared with  
308 unmodified MSLN-CAR-iMACs after co-cultured with AsPC-1 pancreatic cancer cells



309 for 24 h (Extended Data Fig. 12a). *In vitro* tumor killing capacity was enhanced in  
310 *ACOD1*<sup>-/-</sup> MSLN-CAR-iMACs (Extended Data Fig. 12b) which could be reversed by  
311 supplementing 4-OI (Extended Data Fig. 12c). The expression of pro-inflammatory  
312 genes was also elevated in *ACOD1*<sup>-/-</sup> MSLN-CAR-iMACs (Extended Data Fig. 12d). In  
313 line with the *in vitro* results, *in vivo* assay using a pancreatic tumor mouse model with  
314 intraperitoneally injected AsPC-1 cells also demonstrated the stronger anti-tumor  
315 activity of *ACOD1*<sup>-/-</sup> MSLN-CAR-iMACs (Extended Data Fig. 12e-h).

316

317 ***ACOD1* deletion promoted the anti-tumor activity of MSLN-CAR-iMACs in**  
318 **combination with immune check point inhibitors *in vivo***

319 Tumor cells evade normal immune system via transmitting inhibitory signals to myeloid  
320 cells<sup>22</sup> and lymphocytes<sup>23</sup>. Immune checkpoint is one of the mechanisms that regulate  
321 cancer immune escape. For instance, CD47 is expressed on many cancer cells, and  
322 binding of CD47 to signal-regulatory protein  $\alpha$  (SIRP $\alpha$ ) on macrophages results in  
323 inhibition of macrophage phagocytic activity<sup>24</sup>. Programmed cell death protein 1 (PD-  
324 1) is an immune checkpoint receptor mainly upregulated on activated T cells for the  
325 induction of immune tolerance. It's well known that PD-1-PD-L1 blockade could  
326 activate T cells<sup>25</sup>. PD-1 is also expressed on tumor associated macrophages, and its  
327 expression is negatively correlated with phagocytic potency of macrophages<sup>26</sup>. We  
328 hypothesized that the combination of CAR-iMACs with ICIs may enhance the anti-  
329 tumor activity. So we assessed two combination immunotherapy strategies using  
330 MSLN-CAR-iMACs with the anti-CD47 antibody and the anti-PD-1 antibody,  
331 respectively.

332 In the first xenograft model, HO-8910 cells were inoculated through orthotopic injection  
333 at the ovary of the mice. After four days, the mice received a single *in situ* intratumoral  
334 injection of iMACs. At the same time, the mice received IP injections of a low dose anti-  
335 CD47 antibody, and it was kept twice a week to further enhance the function of CAR-  
336 iMACs by blocking the "don't eat me" signal (Fig. 7a). The tumor growth was monitored  
337 by BLI (Fig. 7b). Compared with untreated tumor-bearing mice, the low-dose anti-CD47  
338 antibody treatment alone could not inhibit tumor growth. The combination of the low-



339 dose anti-CD47 antibody with the MSLN-CAR-iMACs could inhibit tumor growth to  
340 some extent. Importantly, the combination of low-dose anti-CD47 antibody with  
341 *ACOD1*<sup>-/-</sup> MSLN-iMACs had the most superior tumor suppression effect (Fig. 7c). This  
342 improved anti-tumor activity led to markedly improved survival time compared with all  
343 other conditions (Fig. 7d). In the second xenograft model with the anti-PD-1 antibody,  
344 the mice were inoculated intraperitoneally (IP) with luciferase-expressing HO-8910  
345 cells. After four days, the mice received a single IP injection of iMACs. Meanwhile, the  
346 mice received IP injections of a low dose of the anti-PD-1 antibody, and subsequently  
347 the antibody was used twice a week to further block the PD-1-PD-L1 axis (Fig. 7e).  
348 The mice were monitored by bioluminescent imaging afterwards (Fig. 7f). Compared  
349 with other groups, the combination of the low-dose anti-PD1 antibody with *ACOD1*<sup>-/-</sup>  
350 MSLN-CAR-iMACs had the most superior tumor suppression effect (Fig. 7g), and  
351 markedly lengthened the survival time (Fig. 7h). Together, these data strongly  
352 demonstrated that *ACOD1*-deleted CAR-iMACs combined with ICIs had the most  
353 superior anti-tumor activity.

354

## 355 Discussion

356 The *ACOD1*/*KEAP1*/*NRF2* axis plays a crucial role in maintaining redox balance and  
357 macrophage polarization in mouse and human macrophages<sup>14</sup>. In the mouse sepsis  
358 syndrome model, *Keap1* deletion in macrophages resulted in reduced levels of  
359 inflammatory mediators, organ injury, bacteremia and mortality, whereas *Nrf2* deletion  
360 had the opposite effects<sup>27</sup>. We found that *KEAP1* plays an important role in  
361 macrophage pro-inflammatory activity through a pooled CRISPR screen of metabolic  
362 genes. Our study elucidated that *KEAP1* deletion inhibited whereas *ACOD1* deletion  
363 promoted macrophage pro-inflammatory activity through regulating *NRF2*. We used  
364 screens in both THP1 and iMACs, and the limitation for the screen in iMACs was that  
365 many metabolic genes are necessary for macrophage differentiation and survival, and  
366 thus the essential genes will be missed in the list of positive candidates. In our case,  
367 only several genes were identified from the iMAC screen, including *ACOD1*. The  
368 reason that *ACOD1* can be picked up might be that its expression is not required in

369 unstimulated macrophages or during macrophage differentiation, and it is only induced  
370 upon LPS+IFN- $\gamma$  stimulation. Thus it is not considered as an essential gene. To obtain  
371 more candidates, an inducible system of CRISPR screen would be a better choice in  
372 which Cas9 can be induced after differentiation<sup>28-30</sup>. Besides *ACOD1*, many other  
373 highly ranked genes coming out of our metabolic screen may also contribute to  
374 macrophage pro-inflammatory activity, such as *ULK1*, *GCLM*, *PPARD*, *GPD2*, and so  
375 on. *GPD2* regulates LPS-induced macrophage tolerance via a pathway distinct from  
376 *ACOD1*<sup>31</sup>. Therefore, the double knockout of two genes that work in orthogonal  
377 pathways may represent new metabolic engineering strategies to further enhance  
378 macrophage functions in cancer immune cell therapies.

379

380 *ACOD1* plays a crucial role in mitochondrial metabolism, which is tightly connected to  
381 many aspects of cellular functions. We also observed the maximal oxygen  
382 consumption was decreased in *ACOD1*<sup>-/-</sup> iMACs. *ACOD1* produces itaconate in  
383 response to pathogen infection and inflammation<sup>15</sup>. Itaconate can inhibit  
384 inflammasome activation<sup>32,33</sup> or regulate immune tolerance through succinate  
385 dehydrogenase (SDH) in macrophages<sup>34-36</sup>. For instance, Lampropoulou et.al showed  
386 itaconate could inhibit SDH and resulted in increased succinate level, and *Irg1* deletion  
387 led to abrogation of succinate accumulation<sup>36</sup>, and Chen et.al showed overexpression  
388 of *Irg1*, but not its catalytically inactive mutant, results in elevated intracellular levels of  
389 ITA and succinate<sup>37</sup>. Thus we can not exclude that *ACOD1* deletion might influence the  
390 macrophage polarization phenotype through other downstream metabolites.

391

392 Since *ACOD1* and itaconate have important roles in the anti-inflammatory effects of  
393 macrophages, most previous studies focused on their functions in infectious  
394 diseases<sup>37,38</sup>. However, limited studies have shown the role of human *ACOD1* in  
395 immune-oncology and its possible applications in myeloid cell-based adoptive cell  
396 transfer in cancer immunotherapy. Engineered iMACs such as CAR-iMACs provide a  
397 new platform for cancer immune cell therapy<sup>9,39</sup>. In this study, we demonstrated  
398 *ACOD1* deficiency could promote stronger anti-solid tumor function than wild type

399 MSLN-CAR-iMACs. We have also shown that *ACOD1*<sup>-/-</sup> MSLN-CAR-iMACs combined  
400 with low dose ICIs could further elevated anti-ovarian cancer capacity. Thus, *ACOD1*  
401 is a new metabolic target to engineer CAR-iMACs, in order to elevate their anti-tumor  
402 function and to eliminate tumor cells.

403 Macrophages can both kill cancer cells and modulate the tumor microenvironment  
404 depending on their phagocytosis function and pro-inflammatory activity<sup>40</sup>, which can  
405 be greatly enhanced by *ACOD1* deletion as we have shown above in this work. Our  
406 results also showed that the iMAC-tumor co-culture supernatant alone indeed had  
407 tumor killing function as well. Either cytokines with cytolytic activity or ROS in the  
408 supernatant could confer the function. Neutralizing antibodies of TNF- $\alpha$  and IFN- $\gamma$  did  
409 not abrogate tumor killing function of the supernatant (Fig. 6f). However, we could not  
410 completely rule out there could be other cytokines that mediated the cytolytic activity.  
411 Supplementing NAC reversed the phenotype, suggesting ROS contributed to the  
412 tumor killing function. Regarding indirect functions through other immune cells, as our  
413 experiments were conducted either in the absence of other immune cell types *in vitro*,  
414 or based on immuno-deficient NSG mice, which do not have the endogenous NK and  
415 T cells, the tumor killing activity in these settings was unlikely through stimulating NK  
416 and T cells. We can not exclude that in a humanized model, the engineered CAR-iMAC  
417 cells may also influence the other endogenous immune cells to confer their anti-tumor  
418 activity. Overall, our current data support a multi-level mechanism of CAR-iMACs in  
419 tumor killing activity, including enhanced direct phagocytosis and more ROS produced  
420 by *ACOD1* knockout.

421 Cytokines secreted from highly proliferative immune cells might lead to cytokine  
422 release syndrome. However, as macrophages do not have the capacity to proliferate  
423 *in vivo*, the amount of secreted cytokines might not reach to a level that can lead to  
424 toxicity in patients. Nevertheless, the effect of increased pro-inflammatory cytokines in  
425 *ACOD1*<sup>-/-</sup> macrophages *in vivo* merits further investigations using humanized models  
426 to provide guidance for choosing the optimal dose in clinical research in the future.

427

428 **Methods**

429 **Cell Lines**

430 THP-1 cells, HO-8910 cells, K562 cells, Nalm6 cells, and 293T cells were obtained  
431 from the National Collection of Authenticated Cell Cultures and cultured according to  
432 standard protocols. Human iPSCs were obtained from the reprogramming of  
433 peripheral blood mononuclear cells from a volunteer donor, as described before <sup>10</sup>.  
434 Human iPSCs were cultured in mTeSR medium (85852, STEMCELL Technologies)  
435 with Matrigel Matrix (354277, Corning) coated plates.

436

437 **Plasmid construction and single guide RNA cloning.**

438 All the Cas9-expressing THP-1 cells or iPSC lines in this study were derived by  
439 lentiviral transduction with a Cas9 expression vector containing an optimized sgRNA  
440 backbone (LentiCRISPR v2; Addgene, 52961). All of the sgRNAs were cloned into the  
441 LentiCRISPR v2 vector following the protocol described before<sup>41</sup>. The annealed  
442 sgRNA oligonucleotides were ligated with T4 DNA ligase (M0569S, NEB) to the  
443 BsmB1-digested LentiCRISPR v2 vector.

444

445 **Lentivirus production**

446 We produced lentivirus using HEK293T cells cultured in DMEM supplemented with 1%  
447 penicillin-streptomycin and 10% FBS. The CRISPR library vectors (Human CRISPR  
448 Metabolic Gene Knockout Library; Addgene, Pooled Library #110066) <sup>12</sup> or the single  
449 sgRNA vectors, envelop vector pMD2.G, and packaging vector psPAX2 were mixed in  
450 a 4:3:1 ratio in OPTI-MEM (Thermo Fisher Scientific, 31985070) and PEI  
451 (Polysciences, 9002-98-6), and transfected into HEK293T cells at 80% to 90%  
452 confluence in 10-cm tissue culture plates. The supernatant was collected at 24, 48,  
453 and 72 h post-transfection, filtered via a 0.45 µm filtration unit (Millipore, Cat#  
454 SLHVR33RB), and mixed overnight at 4 °C with one-third volume of 30% PEG8000.  
455 The medium was concentrated at 4200 rpm for 30 min at 4 °C. The pellet was  
456 resuspended in PBS and stored at -80 °C.

457

458 **Transduction of lentivirus containing sgRNAs.**

459 For transfection of THP-1 cells and iPSCs, we infected cells with lentivirus and 5 µg/mL  
460 polybrene overnight, and the medium was changed the following day. After puromycin  
461 (1 µg/mL for THP-1 cells and 250 ng/mL for iPSC) selection for seven days, >95% of  
462 the population was transfected, and the cells were ready to be used for the subsequent  
463 experiments.

464

#### 465 **Pooled CRISPR screen**

466  $1.5 \times 10^7$  THP-1 cells were transduced with a viral library for 24 h (MOI = 0.3). After  
467 puromycin (1 µg/mL) selection for seven days,  $1.5 \times 10^7$  transduced cells were collected  
468 as input samples. The other transduced cells were treated with PMA (50 ng/mL) for 48  
469 h, then stimulated by LPS (50 ng/mL) plus IFN-γ (50 ng/mL) for 24 h. The stimulated  
470 cells were harvested and stained with anti-human CD80-FITC (305206, BioLegend)  
471 for 15 min at room temperature. The CD80-high and CD80-low cells were separated  
472 by flow cytometry sorting. The genomic DNA of cells was isolated, and the sgRNA  
473 library was barcoded and amplified for two rounds of PCR. PCR products were purified  
474 for sequencing on an Illumina HiSeq. The sequencing data was analyzed by  
475 MAGeCK<sup>42</sup>.

476

#### 477 **Generation of CRISPR/Cas9 knockout cells**

478 LentiCRISPR v2 vectors targeting *KEAP1* and *ACOD1* were constructed as described  
479 before<sup>41</sup>. The THP-1 cells and iPSC were infected with lentivirus expressing Cas9 and  
480 sgRNAs targeting *KEAP1* and *ACOD1*. After puromycin selection for seven days, the  
481 THP-1 cells were expanded, and knockout efficiency was verified using qPCR and  
482 western blotting. After puromycin selection for three days, iPSCs were passaged, and  
483 the clones grown from single cells were picked up and expanded. The knockout  
484 efficiency of iPSC was verified by sequencing, qPCR, and western blot analyses.

485

#### 486 **Derivation of iMACs from iPSCs**

487 The derivation of iMAC from iPSCs has been previously described<sup>10</sup>. Briefly, 8000  
488 iPSCs were seeded in 96-well round-bottom plates with APEL2 medium (05271,

489 STEMCELL Technologies) containing 100 ng/mL human Stem Cell Factor (SCF), 50  
490 ng/mL human Vascular Endothelial Growth Factor (VEGF), 10 ng/mL recombinant  
491 human Bone Morphogenetic Protein 4 (BMP-4), 5 ng/mL human FGF-basic (154 a.a.),  
492 and 10 mM Rho kinase inhibitor (ROCK inhibitor, Y27632, Sigma). After eight days of  
493 hematopoietic differentiation, spin embryoid bodies (EBs) were transferred into  
494 Matrigel-coated 6-well plates under macrophage differentiation conditions.  
495 Macrophage differentiation medium is StemSpan-XF (100-0073, STEMCELL  
496 Technologies) containing 10 ng/mL human FGF-basic (154 a.a.), 50 ng/mL human  
497 Vascular Endothelial Growth Factor (VEGF), 50 ng/mL human Stem Cell Factor (SCF),  
498 10 ng/mL recombinant human Insulin-like Growth Factor-1 (IGF1), 20 ng/mL IL-3, 50  
499 ng/mL recombinant human M-CSF, and 50 ng/mL recombinant human GM-CSF. The  
500 floating cells were collected from the supernatant and directly transferred into uncoated  
501 6-well plates in macrophage culture medium. The macrophage culture medium is  
502 StemSpan-XF containing 50 ng/mL recombinant human M-CSF and 50 ng/mL  
503 recombinant human GM-CSF.

504

#### 505 **Flow cytometry**

506 The tMACs or iMACs were stimulated with LPS and IFN- $\gamma$  for the indicated time. The  
507 single-cell suspensions were then prepared and incubated with an antibody or  
508 antibody cocktails for 15 min at room temperature for cell surface staining. Antibodies  
509 used in this study were PE Human IgG1 Isotype Control (403503, Biolegend), APC  
510 Human IgG1 Isotype Control (403505, Biolegend), FITC Human IgG1 Isotype Control  
511 (403507, Biolegend), APC anti-human CD206 (321109, Biolegend), APC anti-human  
512 CD86 (374207, Biolegend), PE anti-human CD80 (305208, Biolegend), PE anti-human  
513 CD163 (333605, Biolegend), FITC anti-human CD14 (301803, Biolegend) and APC  
514 anti-humanCD11B (301309, Biolegend). Data were recorded on Beckman DxFLEX  
515 and analyzed with the FlowJo V10 software.

516

#### 517 **Enzyme-linked immunosorbent assay**

518 The supernatant of iMAC culture or tumor-iMAC co-culture was collected and

519 centrifuged at 300×g for 10 minutes to remove the precipitate. Human IL-6, IL-1β,  
520 CXCL-10, IFN-γ and TNF-α were quantified using Elisa kits (MultiSciences, EK106,  
521 EK101B, EK168, EK180, EK182) following the manufacturer's protocols.

522

### 523 ***In vivo* anti-tumor assay**

524 For *in vivo* experiments, 6–10-week-old female NOD-scid IL2Rg<sub>null</sub> (NSG) mice  
525 (Gempharmatech, Jiangsu, n=5 per group) were used. All mice were maintained  
526 under pathogen-free conditions under the Zhejiang University Institutional Animal Care  
527 and followed the committee's approved protocols. In the first ovarian cancer mouse  
528 model, 2×10<sup>5</sup> luciferase gene expressing HO-8910 cells were inoculated  
529 intraperitoneally (IP) before treatment (day -4). After tumor cell inoculation, mice were  
530 randomly assigned to experimental groups. Four days later, 4×10<sup>6</sup> MSLN-CAR-iMACs  
531 or ACOD1<sup>-/-</sup> MSLN-CAR-iMACs were inoculated IP (day 0) for therapy. The tumor  
532 burden was determined by bioluminescence imaging (BLI) using an IVIS Imaging  
533 System (Biospace Lab).

534 In the ovarian cancer orthotopic injection mouse model with CAR-iMAC and anti-CD47  
535 antibody combined therapy, 1×10<sup>5</sup> luciferase gene expressing HO-8910 cells were  
536 inoculated directly into ovary before treatment (day -4). After tumor cell inoculation,  
537 mice were randomly assigned to experimental groups. Four days later, mice received  
538 a single in situ injection of 6×10<sup>6</sup> MSLN-CAR-iMAC or ACOD1<sup>-/-</sup> MSLN-CAR-iMACs  
539 (day 0) combined with a low-dose CD47 antibody (50 μg/mouse, twice a week) for  
540 therapy. Tumor burden was determined by BLI.

541 In ovarian cancer mouse model with CAR-iMAC and the anti-PD1 antibody combined  
542 therapy, 2×10<sup>5</sup> luciferase gene expressing HO-8910 cells were inoculated  
543 intraperitoneally (IP) before treatment (day -4). After tumor cell inoculation, mice were  
544 randomly assigned to experimental groups. Four days later, mice received a single  
545 injection of 4×10<sup>6</sup> MSLN-CAR-iMAC or ACOD1<sup>-/-</sup> MSLN-CAR-iMACs intraperitoneally  
546 (day 0) combined with a low-dose anti-PD1 antibody (100 μg/mouse, twice a week) for  
547 therapy. The tumor burden was determined by bioluminescence imaging (BLI) using  
548 an IVIS Imaging System.



549 In the pancreatic cancer mouse model, 6–10-week-old male NSG mice(n=5 per group)  
550 were used.  $1 \times 10^5$  AsPC-1 cells were inoculated intraperitoneally before treatment (day  
551 -4). After tumor cell inoculation, mice were randomly assigned to experimental groups.  
552 AsPC-1 cells grow fast in vivo, in order to get a better therapeutic effect, a higher effect  
553 target ratio was used. Four days later,  $1.5 \times 10^7$  MSLN-CAR-iMACs or ACOD1<sup>-/-</sup> MSLN-  
554 CAR-iMACs were intraperitoneally injected (day 0). The tumor burden was determined  
555 by BLI later.

556

### 557 **Western blotting**

558 Pellets from  $1 \times 10^6$  cells were collected and resuspended with 100  $\mu$ L RIPA Buffer  
559 (Beyotime, Cat# P0013J). The samples were incubated on ice for 30 min and  
560 centrifuged at 13000 rpm for 15 min at 4 °C. The supernatant was collected, and the  
561 protein concentration was measured by BCA analysis (Thermo Scientific, Cat# 23225).  
562 Approximately 50  $\mu$ g of total protein was loaded for western blotting.

563

### 564 **Real-time reverse transcription-PCR**

565 RNA was extracted from macrophages or tumor cells using Total RNA Isolation Kit V2  
566 (Vazyme, Cat# RC112-01). Reverse transcription from RNA to cDNA use Hiscript  
567 Reverse Transcriptase (Vazyme, Cat# R302-01). PCR reactions were performed on a  
568 CFX96 Real-Time PCR System (Bio-Rad Laboratories) using ChamQ Universal SYBR  
569 qPCR Master Mix (Vazyme, Cat# Q711-02).

570

### 571 **Metabolic studies**

572 Oxygen consumption rate (OCR) was measured using a Seahorse XF Cell Mito Stress  
573 Test Kit (Agilent, 103015-100). iMACs were resuspended in an RPMI1640 medium  
574 containing LPS (50 ng/mL) plus IFN- $\gamma$  (50 ng/mL) and then seeded at  $5 \times 10^4$  cells/well  
575 in an XF96 plate. Eight hours later, the RPMI1640 medium was changed to XF RPMI  
576 medium. The oxygen consumption rate was measured (pmol/min) in real-time in an  
577 XFe96 Extracellular Flux Analyzer. iMACs were stimulated with LPS and IFN- $\gamma$  for 24  
578 h, and the OCR was in response to 1.5  $\mu$ M oligomycin, 2  $\mu$ M fluorocarbonylcyanide

579 phenylhydrazine (FCCP) and 500 nM rotenone and antimycin A. Basal OCR, maximal  
580 respiration capacity (MRC), ATP linked respiration, and mitochondrial spare respiratory  
581 capacity (SRC) was calculated by WAVE V2.6 software.

582

### 583 **RNA-seq**

584 Total RNA was isolated and purified using FastPure Cell/Tissue Total RNA Isolation Kit  
585 V2 (Vazyme, RC112-01) from  $2 \times 10^6$  tMACs according to the manufacturer's protocol.  
586 RNA qualification was performed using Nanodrop to check RNA purity (OD260/OD280)  
587 and Agilent 2100 to check RNA integrity. A total amount of 2  $\mu$ g RNA per sample was  
588 used for RNA-seq libraries preparation. RNA-seq libraries were prepared using VAHTS  
589 Stranded mRNA-seq Library Prep Kit for Illumina V2 (Vazyme, NR612-02) according  
590 to the manufacturer's protocol and sequenced on an Illumina HiSeq 2500. The  
591 threshold of differentially expressed genes is  $p\text{-adj} < 0.05$ . The color descending from  
592 red to blue in the heatmaps of differentially expressed genes indicated  $\log_{10}(\text{FPKM}+1)$   
593 from large to small.

594

### 595 **Gene set enrichment analysis**

596 To identify "biological signatures" depleted or enriched following CD80-based sorting  
597 or in the *KEAP1* knockout macrophages, we used DAVID Bioinformatics Resources  
598 (<https://david.ncifcrf.gov/>). We focused on the biological oncology of the GO gene sets  
599 to obtain the indicated enrichment score.

600

### 601 **Statistical analysis**

602 All data are presented as mean  $\pm$  SD. Comparisons between different groups were  
603 analyzed by the one-way analysis of variance (ANOVA), two-way analysis of variance  
604 (ANOVA), and unpaired two-tailed Student's *t*-test. Kaplan-Meier survival curves were  
605 compared with the log-rank test. Statistical analyses were performed in GraphPad  
606 Prism 9.0.0 software using the statistical tests indicated for each experiment. All tests  
607 were considered significant at  $p < 0.05$ .

608

## 609 **Data availability**

610 The RNA-seq data that support the findings of this study have been deposited in the  
611 GEO under the following accession codes: GSE216352. The CRISPR Screen datasets  
612 have been deposited in the GEO under the accession number GSE216353. All other  
613 data supporting the findings of this study are available from the corresponding author  
614 on reasonable request. Source data are provided with this paper.

615

## 616 **Acknowledgments**

617 We thank Tiffany Horng (School of life science and technology, ShanghaiTech  
618 University) for providing advises on this work. This work was sponsored by the National  
619 Key Research and Development Program of China (2018YFA0107103 and  
620 2018YFC1005002), the National Natural Science Foundation of China (31871453 and  
621 91857116), Zhejiang Innovation Team grant (2019R01004), and the Zhejiang Natural  
622 Science Foundation (LR19C120001).

623

## 624 **References**

- 625 1 Varol, C., Mildner, A. & Jung, S. Macrophages: development and tissue specialization.  
626 *Annual review of immunology* **33**, 643-675, doi:10.1146/annurev-immunol-032414-  
627 112220 (2015).
- 628 2 Murray, P. J. *et al.* Macrophage activation and polarization: nomenclature and  
629 experimental guidelines. *Immunity* **41**, 14-20, doi:10.1016/j.immuni.2014.06.008 (2014).
- 630 3 Xue, J. *et al.* Transcriptome-based network analysis reveals a spectrum model of human  
631 macrophage activation. *Immunity* **40**, 274-288, doi:10.1016/j.immuni.2014.01.006 (2014).
- 632 4 Italiani, P. & Boraschi, D. From Monocytes to M1/M2 Macrophages: Phenotypical vs.  
633 Functional Differentiation. *Front Immunol* **5**, 514, doi:10.3389/fimmu.2014.00514 (2014).
- 634 5 Lu, T. *et al.* Tumor-infiltrating myeloid cells induce tumor cell resistance to cytotoxic T cells  
635 in mice. *The Journal of clinical investigation* **121**, 4015-4029, doi:10.1172/jci45862 (2011).
- 636 6 Yang, L. & Zhang, Y. Tumor-associated macrophages: from basic research to clinical  
637 application. *Journal of hematology & oncology* **10**, 58, doi:10.1186/s13045-017-0430-2  
638 (2017).
- 639 7 Pyonteck, S. M. *et al.* CSF-1R inhibition alters macrophage polarization and blocks glioma  
640 progression. *Nat Med* **19**, 1264-1272, doi:10.1038/nm.3337 (2013).
- 641 8 Brempelis, K. J. *et al.* Genetically engineered macrophages persist in solid tumors and  
642 locally deliver therapeutic proteins to activate immune responses. *J Immunother Cancer*  
643 **8**, doi:10.1136/jitc-2020-001356 (2020).

- 644 9 Klichinsky, M. *et al.* Human chimeric antigen receptor macrophages for cancer  
645 immunotherapy. *Nat Biotechnol* **38**, 947-953, doi:10.1038/s41587-020-0462-y (2020).
- 646 10 Zhang, L. *et al.* Pluripotent stem cell-derived CAR-macrophage cells with antigen-  
647 dependent anti-cancer cell functions. *Journal of hematology & oncology* **13**, 153,  
648 doi:10.1186/s13045-020-00983-2 (2020).
- 649 11 Joung, J. *et al.* Genome-scale CRISPR-Cas9 knockout and transcriptional activation  
650 screening. *Nature Protocols* **12**, 828-863, doi:10.1038/nprot.2017.016 (2017).
- 651 12 Birsoy, K. *et al.* An Essential Role of the Mitochondrial Electron Transport Chain in Cell  
652 Proliferation Is to Enable Aspartate Synthesis. *Cell* **162**, 540-551,  
653 doi:10.1016/j.cell.2015.07.016 (2015).
- 654 13 Baker, R. G., Hayden, M. S. & Ghosh, S. NF-kappaB, inflammation, and metabolic disease.  
655 *Cell Metab* **13**, 11-22, doi:10.1016/j.cmet.2010.12.008 (2011).
- 656 14 Mills, E. L. *et al.* Itaconate is an anti-inflammatory metabolite that activates Nrf2 via  
657 alkylation of KEAP1. *Nature* **556**, 113-117, doi:10.1038/nature25986 (2018).
- 658 15 Michelucci, A. *et al.* Immune-responsive gene 1 protein links metabolism to immunity by  
659 catalyzing itaconic acid production. *Proc Natl Acad Sci U S A* **110**, 7820-7825,  
660 doi:10.1073/pnas.1218599110 (2013).
- 661 16 Hayes, J. D. & Dinkova-Kostova, A. T. The Nrf2 regulatory network provides an interface  
662 between redox and intermediary metabolism. *Trends Biochem Sci* **39**, 199-218,  
663 doi:10.1016/j.tibs.2014.02.002 (2014).
- 664 17 Peace, C. G. & O'Neill, L. A. The role of itaconate in host defense and inflammation. *J Clin*  
665 *Invest* **132**, doi:10.1172/JCI148548 (2022).
- 666 18 Potteti, H. R. *et al.* Nrf2 Regulates Anti-Inflammatory A20 Deubiquitinase Induction by LPS  
667 in Macrophages in Contextual Manner. *Antioxidants (Basel)* **10**,  
668 doi:10.3390/antiox10060847 (2021).
- 669 19 Hooftman, A. *et al.* The Immunomodulatory Metabolite Itaconate Modifies NLRP3 and  
670 Inhibits Inflammasome Activation. *Cell metabolism* **32**, 468-478.e467,  
671 doi:10.1016/j.cmet.2020.07.016 (2020).
- 672 20 Olnagier, D. *et al.* Nrf2 negatively regulates STING indicating a link between antiviral  
673 sensing and metabolic reprogramming. *Nature communications* **9**, 3506,  
674 doi:10.1038/s41467-018-05861-7 (2018).
- 675 21 West, A. P. *et al.* TLR signalling augments macrophage bactericidal activity through  
676 mitochondrial ROS. *Nature* **472**, 476-480, doi:10.1038/nature09973 (2011).
- 677 22 Feng, M. *et al.* Phagocytosis checkpoints as new targets for cancer immunotherapy.  
678 *Nature reviews. Cancer* **19**, 568-586, doi:10.1038/s41568-019-0183-z (2019).
- 679 23 Woo, S. R. *et al.* Immune inhibitory molecules LAG-3 and PD-1 synergistically regulate T-  
680 cell function to promote tumoral immune escape. *Cancer research* **72**, 917-927,  
681 doi:10.1158/0008-5472.Can-11-1620 (2012).
- 682 24 Barclay, A. N. & Brown, M. H. The SIRP family of receptors and immune regulation. *Nature*  
683 *reviews. Immunology* **6**, 457-464, doi:10.1038/nri1859 (2006).
- 684 25 Nishimura, H., Nose, M., Hiai, H., Minato, N. & Honjo, T. Development of lupus-like  
685 autoimmune diseases by disruption of the PD-1 gene encoding an ITIM motif-carrying  
686 immunoreceptor. *Immunity* **11**, 141-151, doi:10.1016/s1074-7613(00)80089-8 (1999).
- 687 26 Gordon, S. R. *et al.* PD-1 expression by tumour-associated macrophages inhibits

- 688 phagocytosis and tumour immunity. *Nature* **545**, 495-499, doi:10.1038/nature22396  
689 (2017).
- 690 27 Kong, X. *et al.* Enhancing Nrf2 pathway by disruption of Keap1 in myeloid leukocytes  
691 protects against sepsis. *Am J Respir Crit Care Med* **184**, 928-938,  
692 doi:10.1164/rccm.201102-0271OC (2011).
- 693 28 González, F. *et al.* An iCRISPR platform for rapid, multiplexable, and inducible genome  
694 editing in human pluripotent stem cells. *Cell Stem Cell* **15**, 215-226,  
695 doi:10.1016/j.stem.2014.05.018 (2014).
- 696 29 Ihry, R. J. *et al.* Genome-Scale CRISPR Screens Identify Human Pluripotency-Specific  
697 Genes. *Cell Rep* **27**, 616-630.e616, doi:10.1016/j.celrep.2019.03.043 (2019).
- 698 30 Sun, N. *et al.* Development of drug-inducible CRISPR-Cas9 systems for large-scale  
699 functional screening. *BMC Genomics* **20**, 225, doi:10.1186/s12864-019-5601-9 (2019).
- 700 31 Langston, P. K. *et al.* Glycerol phosphate shuttle enzyme GPD2 regulates macrophage  
701 inflammatory responses. *Nat Immunol* **20**, 1186-1195, doi:10.1038/s41590-019-0453-7  
702 (2019).
- 703 32 Bambouskova, M. *et al.* Itaconate confers tolerance to late NLRP3 inflammasome  
704 activation. *Cell reports* **34**, 108756, doi:10.1016/j.celrep.2021.108756 (2021).
- 705 33 Zhang, S. *et al.* Dimethyl Itaconate Alleviates the Inflammatory Responses of Macrophages  
706 in Sepsis. *Inflammation* **44**, 549-557, doi:10.1007/s10753-020-01352-4 (2021).
- 707 34 Domínguez-Andrés, J. *et al.* The Itaconate Pathway Is a Central Regulatory Node Linking  
708 Innate Immune Tolerance and Trained Immunity. *Cell metabolism* **29**, 211-220.e215,  
709 doi:10.1016/j.cmet.2018.09.003 (2019).
- 710 35 O'Neill, L. A. J. & Artyomov, M. N. Itaconate: the poster child of metabolic reprogramming  
711 in macrophage function. *Nature reviews. Immunology* **19**, 273-281, doi:10.1038/s41577-  
712 019-0128-5 (2019).
- 713 36 Lampropoulou, V. *et al.* Itaconate Links Inhibition of Succinate Dehydrogenase with  
714 Macrophage Metabolic Remodeling and Regulation of Inflammation. *Cell Metab* **24**, 158-  
715 166, doi:10.1016/j.cmet.2016.06.004 (2016).
- 716 37 Chen, L. L. *et al.* Itaconate inhibits TET DNA dioxygenases to dampen inflammatory  
717 responses. *Nat Cell Biol* **24**, 353-363, doi:10.1038/s41556-022-00853-8 (2022).
- 718 38 Liao, S. T. *et al.* 4-Octyl itaconate inhibits aerobic glycolysis by targeting GAPDH to exert  
719 anti-inflammatory effects. *Nature communications* **10**, 5091, doi:10.1038/s41467-019-  
720 13078-5 (2019).
- 721 39 Morrissey, M. A. *et al.* Chimeric antigen receptors that trigger phagocytosis. *eLife* **7**,  
722 doi:10.7554/eLife.36688 (2018).
- 723 40 Gul, N. *et al.* Macrophages eliminate circulating tumor cells after monoclonal antibody  
724 therapy. *J Clin Invest* **124**, 812-823, doi:10.1172/JCI66776 (2014).
- 725 41 Sanjana, N. E., Shalem, O. & Zhang, F. Improved vectors and genome-wide libraries for  
726 CRISPR screening. *Nat Methods* **11**, 783-784, doi:10.1038/nmeth.3047 (2014).
- 727 42 Li, W. *et al.* MAGeCK enables robust identification of essential genes from genome-scale  
728 CRISPR/Cas9 knockout screens. *Genome Biol* **15**, 554, doi:10.1186/s13059-014-0554-4  
729 (2014).

730

731

732 **Figure Legends**

733 **Fig. 1 | A CRISPR screen identified *KEAP1* deletion abrogated LPS and IFN- $\gamma$**   
734 **induced pro-inflammatory activation in macrophages. a**, A schematic diagram of  
735 the pooled CRISPR screen of metabolic genes in THP1-induced macrophages or  
736 tMACs. **b**, A volcano plot displaying sgRNA-targeted genes enriched in the CD80-high  
737 (blue) and CD80-low (red) populations. **c**, The protein level of KEAP1 in WT and  
738 *KEAP1*-deficient tMACs. **d-e**, Flow cytometry plots and quantification of CD80  
739 expression on WT and *KEAP1*-deficient tMACs after LPS and IFN- $\gamma$  stimulation for 0,  
740 2, 8, and 24 h. **f**, qRT-PCR analysis of IL6, IL1B, CXCL9, and CXCL10 expression in  
741 WT and *KEAP1*-deficient tMACs after LPS and IFN- $\gamma$  stimulation at different time  
742 points (n=3). Data were repeated independently in three separate experiments. **e-f**,  
743 The data were displayed as mean  $\pm$  SD. Statistics by two-way ANOVA test.

744

745 **Fig. 2 | *ACOD1* deletion promoted pro-inflammatory activation in tMACs. a**, The  
746 relative expression of *ACOD1* in WT and sg*ACOD1* transduced tMACs with LPS and  
747 IFN- $\gamma$  stimulation at the indicated time points (n=3). **b**, The protein level of ACOD1 in  
748 WT and sg*ACOD1*-transduced cells after LPS and IFN- $\gamma$  stimulation for 24 h. **c,d**, Flow  
749 cytometry plots and quantification of CD80 expression in unstimulated, WT, and  
750 sg*ACOD1* transduced tMACs with indicated treatments (d, n=3). The tMACs were  
751 stimulated by 50 ng/mL LPS and 50 ng/mL IFN- $\gamma$  for 24 h, then withdrawn from the  
752 stimulation and further cultured for 24 h (Day 1) or 48 h (Day 2). **e**, qRT-PCR for mRNA  
753 expression of pro-inflammatory genes in WT and sg*ACOD1* transduced tMACs after  
754 LPS and IFN- $\gamma$  stimulation at different time points (n=3). **a, d, e**, Data was shown as  
755 mean  $\pm$  SD. Statistics by two-way ANOVA test.

756

757 **Fig.3 | *ACOD1*-deleted human iPSC-derived macrophages demonstrated**  
758 **enhanced pro-inflammatory activation. a**, Comparison of the DNA sequence in the  
759 *ACOD1* knockout iPSC clone (by Sanger sequencing) with the *ACOD1* WT DNA  
760 sequence showed an 8 bp deletion in the sgRNA targeted region. **b**, Western blotting  
761 for ACOD1 expression in WT and *ACOD1*<sup>-/-</sup> iMACs after LPS and IFN- $\gamma$  stimulation for



762 24 h. **c**, Mass spectrometry quantification of the cellular itaconate (ITA) concentration  
763 in WT and *ACOD1*<sup>-/-</sup> iMACs after LPS and IFN- $\gamma$  stimulation for 24 h (WT, n=6; *ACOD1*<sup>-/-</sup>,  
764 n=4). **d,e**, CD80 expression on WT and *ACOD1*<sup>-/-</sup> iMACs and mean fluorescence  
765 intensity (MFI) quantification was determined by flow cytometry under different  
766 treatments, including 100 or 50 ng/mL LPS plus 50 ng/mL IFN- $\gamma$  stimulation for 24 h (e,  
767 n=3). **f**, The levels of the indicated cytokines/chemokines in the medium of iMAC  
768 culturing were determined 24 h post IFN- $\gamma$  and LPS challenge (n=3). **g**, Seahorse  
769 extracellular metabolic flux analysis of oxygen consumption rates (OCRs). LPS and  
770 IFN- $\gamma$  stimulated WT or *ACOD1*<sup>-/-</sup> iMACs were sequentially treated with oligomycin (1.5  
771  $\mu$ M), fluorocarbonyl cyanide phenylhydrazone (FCCP; 2  $\mu$ M), and rotenone and  
772 antimycin A (0.5  $\mu$ M each) (n=3). **h**, Basal OCR, maximal respiration capacity (MRC),  
773 ATP production rate and spare respiration capacity (SRC) were calculated with Wave  
774 2.4.0. (n=3 biological replicates representative of three independent experiments). **c**,  
775 **e, f, g and h**, Data was shown as mean  $\pm$  SD. Statistics by two-way ANOVA test (e) or  
776 unpaired t test (c,f,h).

777

778 **Fig. 4 | *ACOD1*<sup>-/-</sup> iMACs had stronger phagocytosis and anti-cancer cell function.**  
779 **a**, CD80, CD86, CD163, and CD206 expression in WT or *ACOD1*<sup>-/-</sup> iMACs after co-  
780 cultured with Nalm6 (E: T=5:1) for 24 h were measured by flow cytometry and  
781 displayed as histograms. **b**, Quantification of MFI measured by flow cytometry after  
782 co-cultured with Nalm6 (E: T=5:1) for 24 h (day 1), 48 h (day 2), or 72 h (day 3) (n=4).  
783 **c**, qRT-PCR for mRNA expression of pro-inflammatory genes in WT and *ACOD1*<sup>-/-</sup>  
784 iMACs after co-cultured with Nalm6 (E: T=5:1) for 24 h (n=3). **d,e**, Representative flow  
785 cytometry plots and quantification of double positive iMACs after WT and *ACOD1*<sup>-/-</sup>  
786 iMACs were co-cultured with Nalm6 and K562 cells (E: T=3:1) for 24 h (e, n=3). **f,g**,  
787 Representative confocal images and quantification of K562 cells phagocytosed by WT  
788 or *ACOD1*<sup>-/-</sup> iMACs after co-cultured for 24 h (g, WT, n=27; *ACOD1*<sup>-/-</sup>, n=14). The  
789 number of colocalized K562&iMAC and total iMAC in one view was used to calculate  
790 the ratio. **h**, Luciferase assays showing iMAC cytotoxicity against cancer cells when  
791 co-cultured with Nalm6 or K562 cells for 24 h (E: T=5:1, 10:1, or 20:1) (n=3). The



792 luciferase gene has been introduced by lentivirus to tumor cells and expressed in tumor  
793 cells, so that tumor cell viability can be measured by D-luciferin sodium salt in a  
794 luciferase assay. **b, c, g, e and h**, Data was shown as mean  $\pm$  SD. Statistics by two-  
795 way ANOVA test (b and h), unpaired t test (g and e).

796

797 **Fig. 5 | *ACOD1* deletion decreased nucleolar NRF2 protein expression and its**  
798 **activity in iMACs. a**, qRT-PCR for mRNA expression of *NRF2* in WT and *ACOD1*<sup>-/-</sup>  
799 iMACs after LPS and IFN- $\gamma$  stimulation for 2, 8, or 24 h (n=3). **b**, qRT-PCR for mRNA  
800 expression of *NRF2* downstream genes in WT and *ACOD1*<sup>-/-</sup> iMACs after LPS and  
801 IFN- $\gamma$  stimulation for 24 h (n=3). **c,d**, Representative confocal images and  
802 quantification of the NRF2 protein in WT and *ACOD1*<sup>-/-</sup> iMACs after LPS and IFN- $\gamma$   
803 stimulation for 2 h (d, n=60). **a,b** and **d**, Data was shown as mean  $\pm$  SD. Statistics by  
804 two-way ANOVA test.

805

806 **Fig. 6 | *ACOD1* deletion promoted anti-cancer cell activity of iMACs against solid**  
807 **tumors *in vitro* and *in vivo*. a,b**, The expression and quantification of CD80, CD86,  
808 CD163, and CD206 in MSLN or *ACOD1*<sup>-/-</sup> MSLN CAR-iMACs after co-cultured with  
809 HO-8910 cells (E: T=5:1) for 24 h were measured by flow cytometry and displayed as  
810 histograms (b, n=3). **c**, Luciferase assays for CAR-iMAC cytotoxicity activity against  
811 cancer cells when co-cultured with HO-8910 cells for 24 h (E: T=5:1, 10:1, or 20:1)  
812 (5:1, n=3; 10:1, n=5; 20:1, n=5). **d**, Luciferase assays for CAR-iMAC cytotoxicity  
813 activity against cancer cells with or without 4-OI addition when co-cultured with HO-  
814 8910 cells for 24 h (n=3) (E: T=10:1). iMACs were pre-treated with 4-OI (250  $\mu$ M) or  
815 DMSO control for 3 h before challenge with LPS plus IFN- $\gamma$  (50 ng/mL each) for 24 h.  
816 **e**, Luciferase assays for MSLN-CAR-iMAC cytotoxicity activity against cancer cells  
817 with or without SFN (10  $\mu$ M) when co-cultured with HO-8910 cells for 24 h (E: T=10:1)  
818 (n=3). **f**, Luciferase assays for the cytotoxicity activity of the co-culture supernatant  
819 with IgG control, neutralizing antibody (10  $\mu$ g/mL) of IFN- $\gamma$  or TNF- $\alpha$  (n=3). The  
820 supernatant was collected after iMACs were co-cultured with HO-8910 cells for 24 h  
821 (E: T=10:1). **g**, The levels of the indicated cytokines/chemokines in the medium of

822 iMAC-HO-8910 co-culture system were determined 24 h post IFN- $\gamma$  and LPS challenge  
823 (n=3). **h**, Luciferase assays for MSLN-CAR-iMAC cytotoxicity activity against cancer  
824 cells with or without NAC (2.5 mM) when co-cultured with HO-8910 cells for 48 h (E:  
825 T=10:1) (n=3). (**b-h**) Data was shown as mean  $\pm$  SD. (**b, c, d, e, f, h**) Statistics by two-  
826 way ANOVA test. **g**, Statistics by unpaired t test. **i**, A diagram of the *in vivo* treatment  
827 scheme. **j**, IVIS images showing progression of tumor in the above conditions (n=5 per  
828 group). **k**, Tumor burden on day -1, 7, 11, and 14 was quantified and displayed as  
829 mean  $\pm$  SD. statistics by two-way ANOVA test. **l**, The Kaplan-Meier curve  
830 demonstrating survival of the mice. Statistics by two-tailed log-rank test.

831

832 **Fig. 7 | *ACOD1* deletion promoted the anti-ovarian cancer activity of iMACs**  
833 **combining with ICIs *in vivo*.** **a**, A schematic of the *in vivo* study using HO-8910 cells  
834 for a mouse ovarian orthotopic injection model treated with MSLN-CAR-iMACs and  
835 *ACOD1*<sup>-/-</sup> MSLN-CAR-iMACs, and combined with an anti-CD47 antibody. **b**, Tumor  
836 burden was determined by BLI. Images of representative time points were shown (n=5  
837 per group). **c**, Quantification of tumor burden of representative time points was  
838 displayed as mean  $\pm$  SD. Statistics by two-way ANOVA test. **d**, The Kaplan-Meier curve  
839 demonstrating survival of the mice. Statistics by two-tailed log-rank test. **e**, A schematic  
840 of the *in vivo* study using HO-8910 cells for a mouse intraperitoneal injection model  
841 treated with MSLN-CAR-iMACs and *ACOD1*<sup>-/-</sup> MSLN-CAR-iMACs, and combined with  
842 an anti-PD1 antibody. **f**, Tumor burden was determined by BLI. Images of  
843 representative time points were shown (n=5 per group). **g**, Quantification of tumor  
844 burden of representative time points was displayed as mean  $\pm$  SD. Statistics by two-  
845 way ANOVA test. **h**, The Kaplan-Meier curve demonstrating survival of the mice.  
846 Statistics by two-tailed log-rank test.

847

848 **Extended Data Fig. 1 | Identifying the metabolic genes involved in human**  
849 **macrophage activation**, related to **Fig. 1**. **a**, Microscopic pictures showing THP-1 cell  
850 differentiation and polarization. **b**, Flow cytometry plots and percentage of CD80  
851 expression on WT tMACs with or without LPS and IFN- $\gamma$  stimulation for 24 h. **c**, WT

852 and human Metabolic Gene CRISPR Library virus-infected THP-1 cells were  
853 differentiated into macrophages, and CD80 expression was measured by flow  
854 cytometry and demonstrated as histograms. **d**, GO term enrichment analysis with  
855 enriched sgRNA-targeted genes in CD80-high population (up), and CD80-low  
856 population (down). **e**, Counts of sgRNAs targeting *KEAP1* detected in the CD80-high  
857 and CD80-low samples. **f**, Top 20 sgRNA-targeted genes enriched in the CD80-low  
858 populations and CD80-high populations identified by the CRISPR Screen in tMACs. **g**,  
859 The protein level of NF- $\kappa$ B in WT and *NFKB1*-depleted THP-1 cells. **h,i**, Flow cytometry  
860 plots and quantification of CD80 expression on unstained, unstimulated, WT and  
861 *NFKB1*-depleted tMACs (i, n=3). Statistics by one-way ANOVA test.

862

863 **Extended Data Fig. 2 | *KEAP1* deletion in THP-1 cells**, related to **Fig. 1. a**, CRISPR-  
864 Cas9-mediated *KEAP1* KO using three sgRNAs targeting exon 2 of the *KEAP1* gene.  
865 **b,c**, Validation of DNA cleavage efficiency by T7 endonuclease assays in iPSCs (b)  
866 and THP-1 cells (c). **d**, Relative expression of *KEAP1* in WT and sg*KEAP1* transfected  
867 tMACs (n=3). Data was shown as mean  $\pm$  SD. Statistics by one-way ANOVA test.

868

869 **Extended Data Fig. 3 | Pathway enrichment in *KEAP1*-deleted macrophages**,  
870 related to **Fig. 1. a,b**, Top enriched gene sets down-regulated (**a**) or up-regulated (**b**)  
871 in sg*KEAP1*-3-transduced tMACs compared to sgControl-transduced cells after LPS  
872 and IFN- $\gamma$  stimulation for 8 h.

873

874 **Extended Data Fig. 4 | *KEAP1* deletion in human iPSCs**, related to **Fig. 1. a**,  
875 Comparison of the DNA sequence in the *KEAP1* KO iPSC clone (by Sanger  
876 sequencing) with *KEAP1* WT sequence, revealing a 22 bp deletion in the gRNA  
877 targeted region. **b**, The protein expression of *KEAP1* in WT and *KEAP1* KO iPSCs was  
878 evaluated by western blotting. **c**, RNA-seq data for the expression of *KEAP1* in iPSCs  
879 and differentiated cells on day 2, 7, 18, 28, and 38 (iPSC, n=3; Day 2, n=1; Day 7, n=3;  
880 Day 18, n=2; Day 28, n=3; Day 38, n=1). Data was shown as mean  $\pm$  SD.

881

882 **Extended Data Fig. 5 | *ACOD1* deletion in human macrophages resulted in**  
883 **enhanced pro-inflammation activation**, related to **Fig. 2. a**, Top 20 sgRNA targeted  
884 genes enriched in the CD80-high population identified by a CRISPR Screen in iPSC-  
885 derived macrophages. **b-e**, CRISPR/Cas9-mediated *ACOD1* knockout using four  
886 sgRNAs located in exons 2 and 4 of the *ACOD1* gene, and validation of DNA cleavage  
887 efficiency by T7 endonuclease assays in 293T (**c**), iPSC (**d**), and THP-1 cells (**e**). **f,g**,  
888 Flow cytometry plots and quantification of CD80 expression in unstimulated, WT, and  
889 sg*ACOD1* transduced tMACs with 50 ng/mL LPS stimulation for 24 h (g, n=3). Data  
890 was shown as mean  $\pm$  SD. Statistics by one-way ANOVA test.

891

892 **Extended Data Fig. 6 | *ACOD1* deletion resulted in elevated pro-inflammatory**  
893 **gene expression in iMACs**, related to **Fig. 3. a**, Representative images of  
894 differentiated iMACs at day 29. **b**, CD14 and CD11B expression on iMACs at day 29  
895 was determined by flow cytometry. **c**, The relative expression of *ACOD1* in WT and  
896 *ACOD1*<sup>-/-</sup> iMACs with the indicated treatments, including unstimulated, and 50 ng/mL  
897 LPS plus 50 ng/mL IFN- $\gamma$  stimulation for 6 and 24 h (n=3). **d**, qRT-PCR for mRNA  
898 expression of pro-inflammatory genes and anti-inflammatory genes in WT and *ACOD1*<sup>-/-</sup>  
899 iMACs after LPS and IFN- $\gamma$  stimulation for 24 h (n=3). **c,d**, Data was shown as mean  
900  $\pm$  SD. Statistics by two-way ANOVA test.

901

902 **Extended Data Fig. 7 | *ACOD1*<sup>-/-</sup> iMACs exhibited increased pro-inflammatory**  
903 **activation when co-cultured with tumor cells**, related to **Fig. 4. a-c**, The  
904 expressions of CD80, CD86, CD163, and CD206 in WT or *ACOD1*<sup>-/-</sup> iMACs after co-  
905 cultured with (a) Nalm6 (E:T=3:1), (b) K562 (E:T=5:1) or (c) K562 (E:T=3:1) for 24 h  
906 measured by flow cytometry and displayed as histograms. **d**, qRT-PCR for mRNA  
907 expression of pro-inflammatory genes in WT and *ACOD1*<sup>-/-</sup> iMACs after co-culture with  
908 Nalm6 (E:T=3:1) for 24 h (n=3). Data was shown as mean  $\pm$  SD. **e**, qRT-PCR for mRNA  
909 expression of pro-inflammatory genes in WT and *ACOD1*<sup>-/-</sup> iMACs after co-culture with  
910 Nalm6 (E:T=5:1) for 24 h (day 1) or 48 h (day 2) (n=3). Data was shown as mean  $\pm$   
911 SD. Statistics by two-way ANOVA test. **f**. WT or *ACOD1*<sup>-/-</sup> iMACs were stained by APC

912 or PE isotype and displayed as histograms. **g**, Gating strategy of CD80-high, CD86-  
913 high, CD163-high, or CD206-high cells. **h**, Gating strategy of the phagocytosis assay.  
914 The iMAC cells were stained with a green dye and thus they were positive in the green  
915 channel, and the tumor cells were transduced with tdtomato, and thus there were  
916 positive in the red channel. The iMAC cells undergoing phagocytosis were those  
917 showing double positive, compared with the single positive iMAC cells or tumor cells.

918

919 **Extended Data Fig. 8 | ACOD1 deletion resulted in decreased nuclear expression**  
920 **of NRF2 and decreased expression of the NF- $\kappa$ B pathway negative regulator**  
921 **TNFAIP3 (A20)**, related to **Fig. 5. a-c**, Representative confocal images of NRF2 in WT  
922 and *ACOD1*<sup>-/-</sup> iMACs after LPS and IFN- $\gamma$  stimulation for (a) 0 h, (b) 30 min, or (c) 8 h.  
923 **d**, qRT-PCR for mRNA expression of *TNFAIP3 (A20)* in WT and *ACOD1*<sup>-/-</sup> iMACs after  
924 LPS and IFN- $\gamma$  stimulation for 24 h (n=3). Data was shown as mean  $\pm$  SD. Statistics  
925 by unpaired t test.

926

927 **Extended Data Fig. 9 | NRF2 deletion promoted pro-inflammatory activation in**  
928 **tMACs**, related to **Fig. 5. a**, Validation of DNA cleavage efficiency by T7 endonuclease  
929 assays in THP-1 cells. **b**, qRT-PCR for mRNA expression of *NRF2* in WT and sg*NRF2*s  
930 transduced THP-1 cells (n=3). **c**, Quantification of CD80 MFI measured by flow  
931 cytometry in WT and sg*NRF2*s transduced macrophages after LPS and IFN- $\gamma$   
932 stimulation for 24 h (WT, n=3; sg*NRF2*-1, n=4; sg*NRF2*-2, n=3; sg*NRF2*-3, n=4). **d**,  
933 qRT-PCR for mRNA expression of pro-inflammatory genes in WT and sg*NRF2*s  
934 transduced macrophages after LPS and IFN- $\gamma$  stimulation for 24 h (n=3). **b-d**, Data  
935 was shown as mean  $\pm$  SD. **b,c**, Statistics by one-way ANOVA test.

936

937 **Extended Data Fig. 10 | ACOD1 deletion promoted ROS production in iMACs**,  
938 related to **Fig. 6. a,b**, ROS in MSLN-CAR and *ACOD1*<sup>-/-</sup> MSLN-CAR-iMACs (a) and  
939 mean fluorescence intensity (MFI) quantification (b) was determined by flow cytometry  
940 after stimulated by LPS plus IFN- $\gamma$  (50 ng/mL each) for 24 h which were stained by  
941 MitoSOX Red Mitochondrial Superoxide Indicator. **b**, Data were shown as mean  $\pm$  SD

942 (n=4), Statistics by unpaired t test.

943

944 **Extended Data Fig. 11 | ACOD1 deletion promoted pro-inflammatory activity of**

945 **iMACs *in vivo***, related to **Fig. 6. a,b**, Subcutaneous tumor model was established in

946 NSG mice. 7 days later, MSLN or *ACOD1*<sup>-/-</sup> MSLN-CAR-iMACs were injected

947 intratumorally. After 7 days, the expression of CD80, CD86, CD206, and CD163 in

948 MSLN or *ACOD1*<sup>-/-</sup> MSLN-CAR-iMACs was measured by flow cytometry and the

949 representative data was displayed as histograms (**a**). Data averaged from three

950 independent experiments were shown as mean  $\pm$  SD (**b**) (n=3). **c,d**, After 14 days, the

951 expression of CD80, CD86, CD206, and CD163 in MSLN or *ACOD1*<sup>-/-</sup> MSLN-CAR-

952 iMACs was measured by flow cytometry and the representative data was displayed as

953 histograms (**c**). Data averaged from three independent experiments were shown as

954 mean  $\pm$  SD (**d**) (n=3). **b,d**, Statistics by two-way ANOVA test.

955

956 **Extended Data Fig. 12 | ACOD1 deletion promoted anti-pancreatic cancer activity**

957 **of iMACs *in vitro* and *in vivo***, related to **Fig. 6. a**, The expression of CD80, CD86,

958 CD206, and CD163 in MSLN or *ACOD1*<sup>-/-</sup> MSLN-CAR-iMACs after co-cultured with

959 pancreatic cancer cell AsPC-1 (E: T=5:1) for 24 h measured by flow cytometry and the

960 representative data was displayed as histograms (left). Data averaged from three

961 independent experiments were shown (right) (n=3). **b**, Luciferase assays for CAR-

962 iMAC cytotoxicity activity against cancer cells when co-cultured with AsPC-1 cells for

963 24 h (E: T=5:1, 10:1, or 20:1) (n=3). **c**, Luciferase assays for CAR-iMAC cytotoxicity

964 activity against cancer cells with or without 4-OI (250  $\mu$ M) when co-cultured with AsPC-

965 1 cells for 24 h (E: T=10:1) (n=3). **d**, qRT-PCR for mRNA expression of pro-

966 inflammatory genes in MSLN or *ACOD1*<sup>-/-</sup> MSLN-CAR-iMACs after co-cultured with

967 AsPC-1 cells (E: T=5:1) for 24 h (n=3). (a-c) Data was shown as mean  $\pm$  SD. Statistics

968 by two-way ANOVA test. **e**, A diagram of the *in vivo* treatment scheme. **f**, IVIS images

969 showing progression of tumor (n=5 per group). **g**, Tumor burden on day -1, 7, 10, 13,

970 16 and 21 was quantified and displayed as mean  $\pm$  SD. Statistics by two-way ANOVA

971 test. **h**, The Kaplan-Meier curve demonstrating survival of the mice. Statistics by two-

972 tailed log-rank test.

973

974 **Extended Data Fig. 13 | The diagram of ACOD1 regulating the anti-tumor effect**  
975 **of MSLN-CAR-iMACs**, MSLN-CAR-iMACs and *ACOD1*<sup>-/-</sup> MSLN-CAR-iMACs were  
976 activated upon stimulation with LPS and IFN- $\gamma$ . The expression of itaconate was  
977 abrogated by *ACOD1* deletion in *ACOD1*<sup>-/-</sup> MSLN-CAR-iMACs. Itaconate is known to  
978 alkylate cysteine residues on KEAP1, promoting the accumulation and nuclear  
979 translocation of NRF2, which leads to the expression of downstream genes with anti-  
980 oxidant and anti-inflammatory properties. Consequently, *ACOD1*<sup>-/-</sup> MSLN-CAR-iMACs  
981 showed lower expression of NRF2, but higher levels of pro-inflammatory cytokines and  
982 ROS. Furthermore, these cells exhibited enhanced M1-like polarization and stronger  
983 anti-tumor activity.



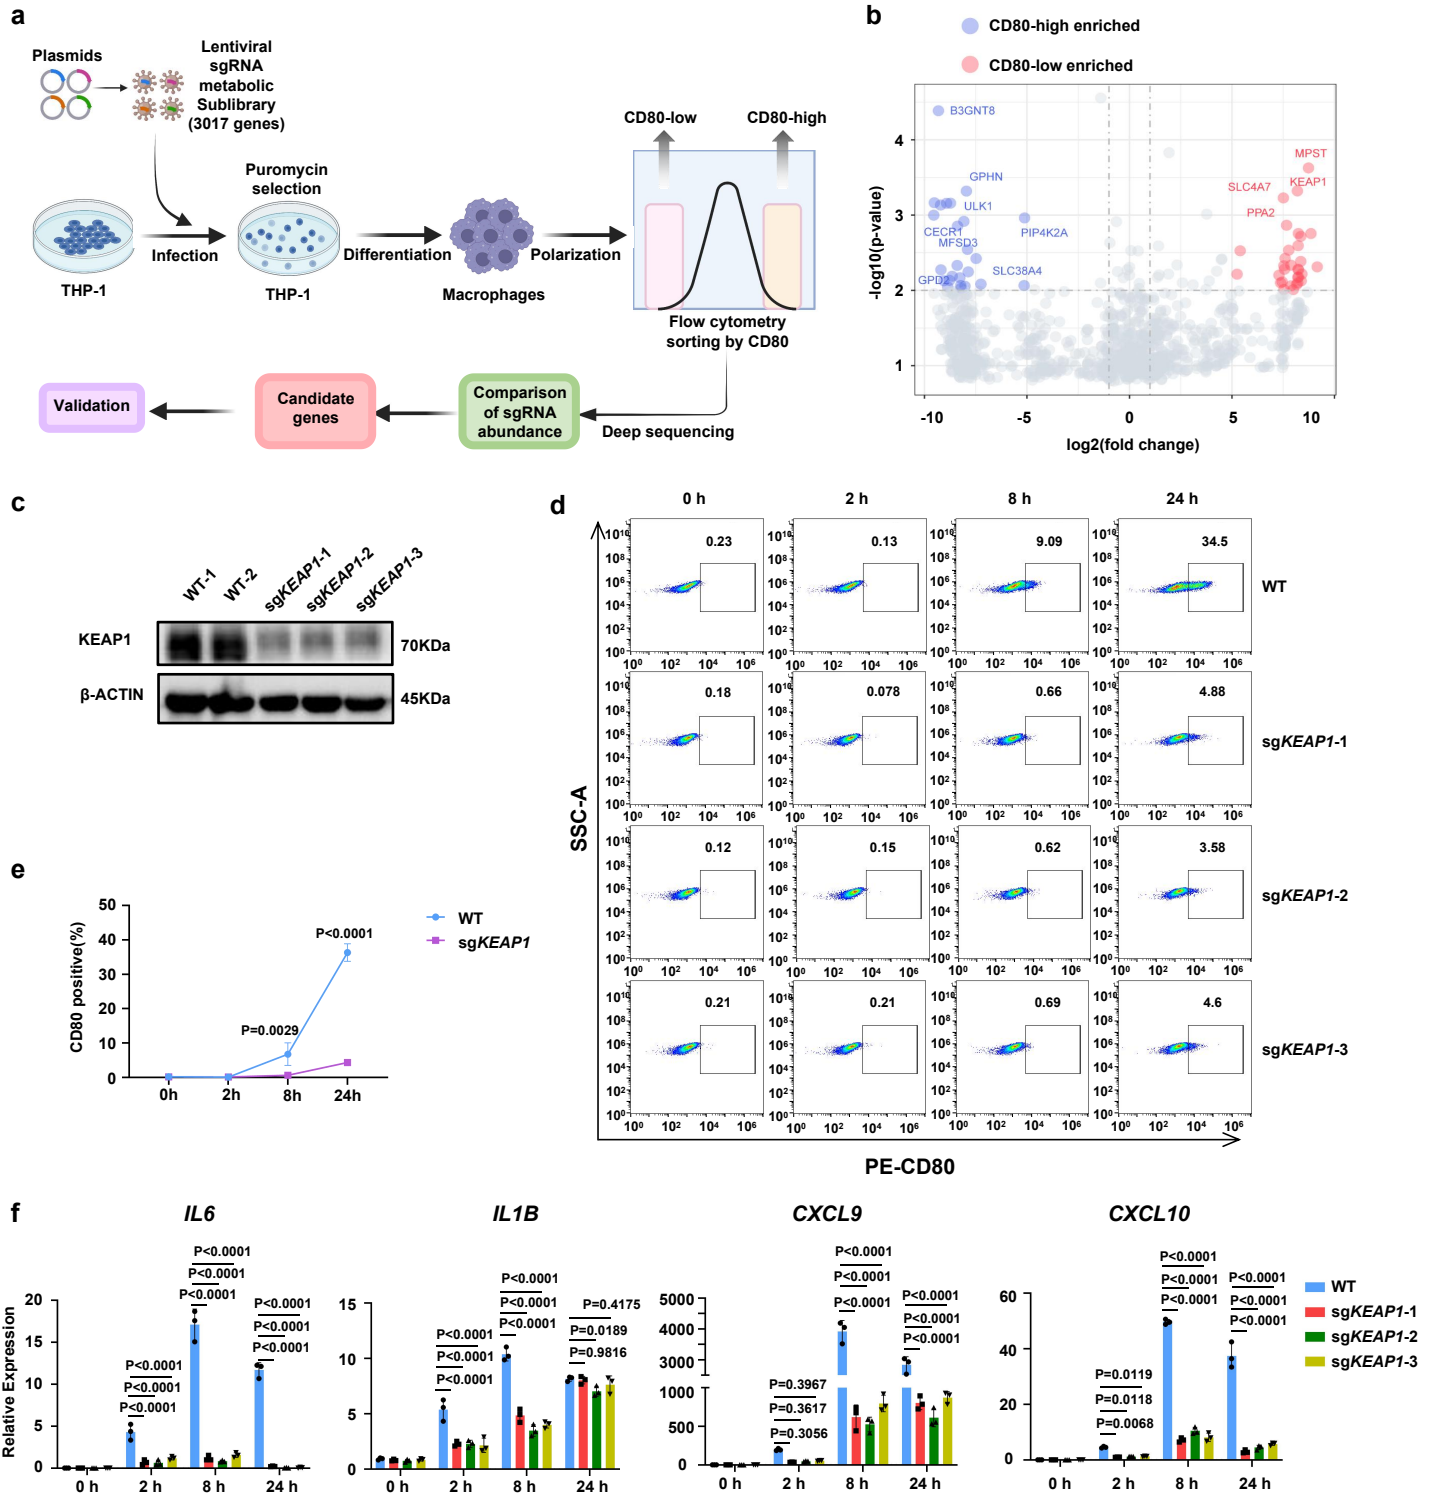

**Fig. 1 | A CRISPR screen identified *KEAP1* deletion abrogated LPS and IFN- $\gamma$  induced pro-inflammatory activation in macrophages.** **a**, A schematic diagram of the pooled CRISPR screen of metabolic genes in THP1-induced macrophages or tMACs. **b**, A volcano plot displaying sgRNA-targeted genes enriched in the CD80-high (blue) and CD80-low (red) populations. **c**, The protein level of KEAP1 in WT and *KEAP1*-deficient tMACs. **d-e**, Flow cytometry plots and quantification of CD80 expression on WT and *KEAP1*-deficient tMACs after LPS and IFN- $\gamma$  stimulation for 0, 2, 8, and 24 h. **f**, qRT-PCR analysis of *IL6*, *IL1B*, *CXCL9*, and *CXCL10* expression in WT and *KEAP1*-deficient tMACs after LPS and IFN- $\gamma$  stimulation at different time points (n=3). Data were repeated independently in three separate experiments. **e-f**, The data were displayed as mean  $\pm$  SD. Statistics by two-way ANOVA test.

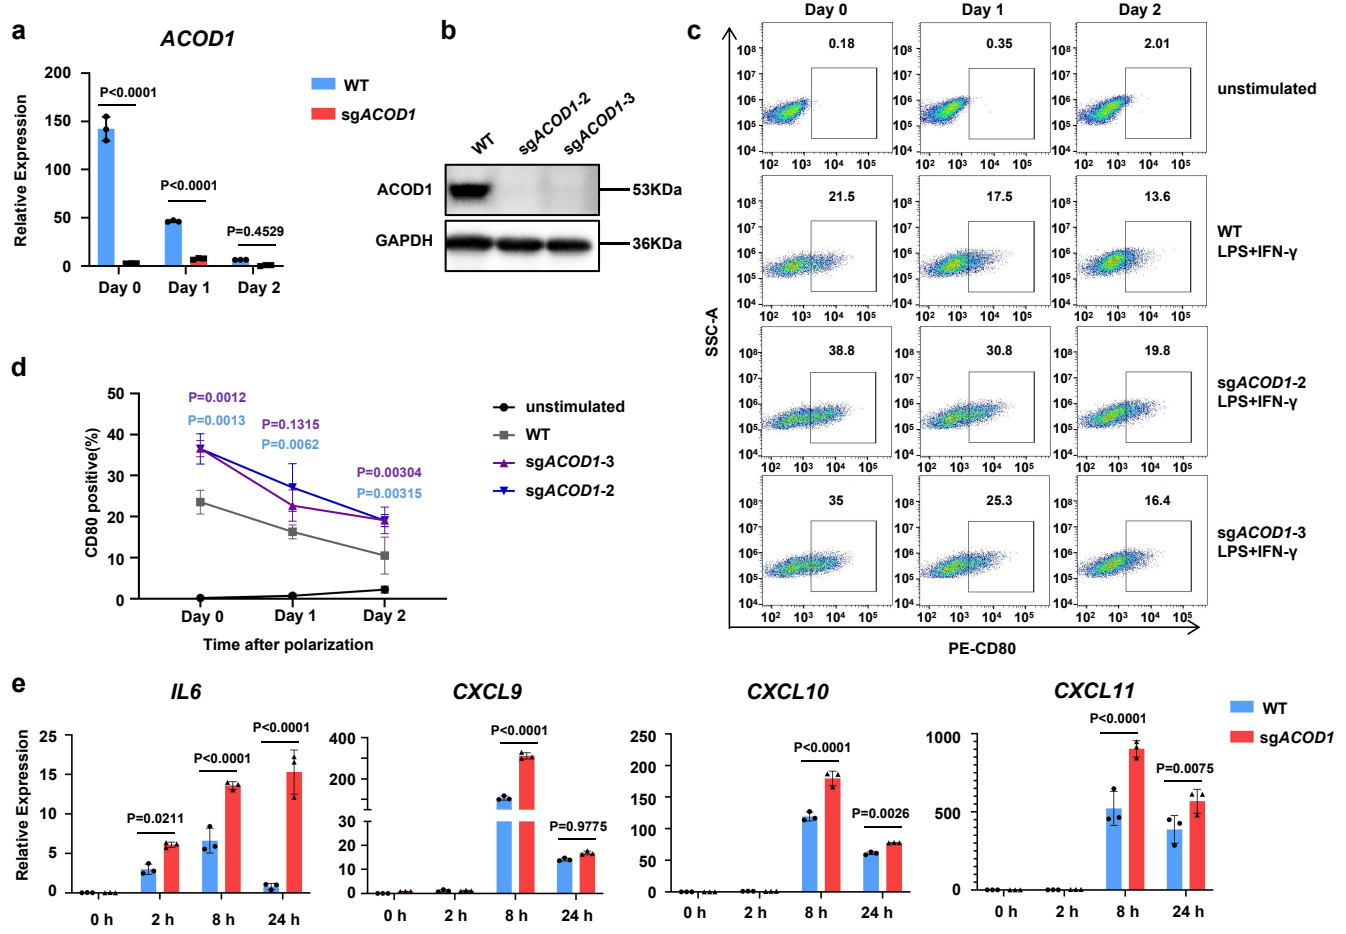

**Fig. 2 | *ACOD1* deletion promoted pro-inflammatory activation in tMACs.** **a**, The relative expression of *ACOD1* in WT and sg*ACOD1* transduced tMACs with LPS and IFN- $\gamma$  stimulation at the indicated time points (n=3). **b**, The protein level of *ACOD1* in WT and sg*ACOD1*-transduced cells after LPS and IFN- $\gamma$  stimulation for 24 h. **c,d**, Flow cytometry plots and quantification of CD80 expression in unstimulated, WT, and sg*ACOD1* transduced tMACs with indicated treatments (d, n=3). The tMACs were stimulated by 50 ng/mL LPS and 50 ng/mL IFN- $\gamma$  for 24 h, then withdrawn from the stimulation and further cultured for 24 h (Day 1) or 48 h (Day 2). **e**, qRT-PCR for mRNA expression of pro-inflammatory genes in WT and sg*ACOD1* transduced tMACs after LPS and IFN- $\gamma$  stimulation at different time points (n=3). **a, d, e**, Data was shown as mean  $\pm$  SD. Statistics by two-way ANOVA test.

## Fig. 3

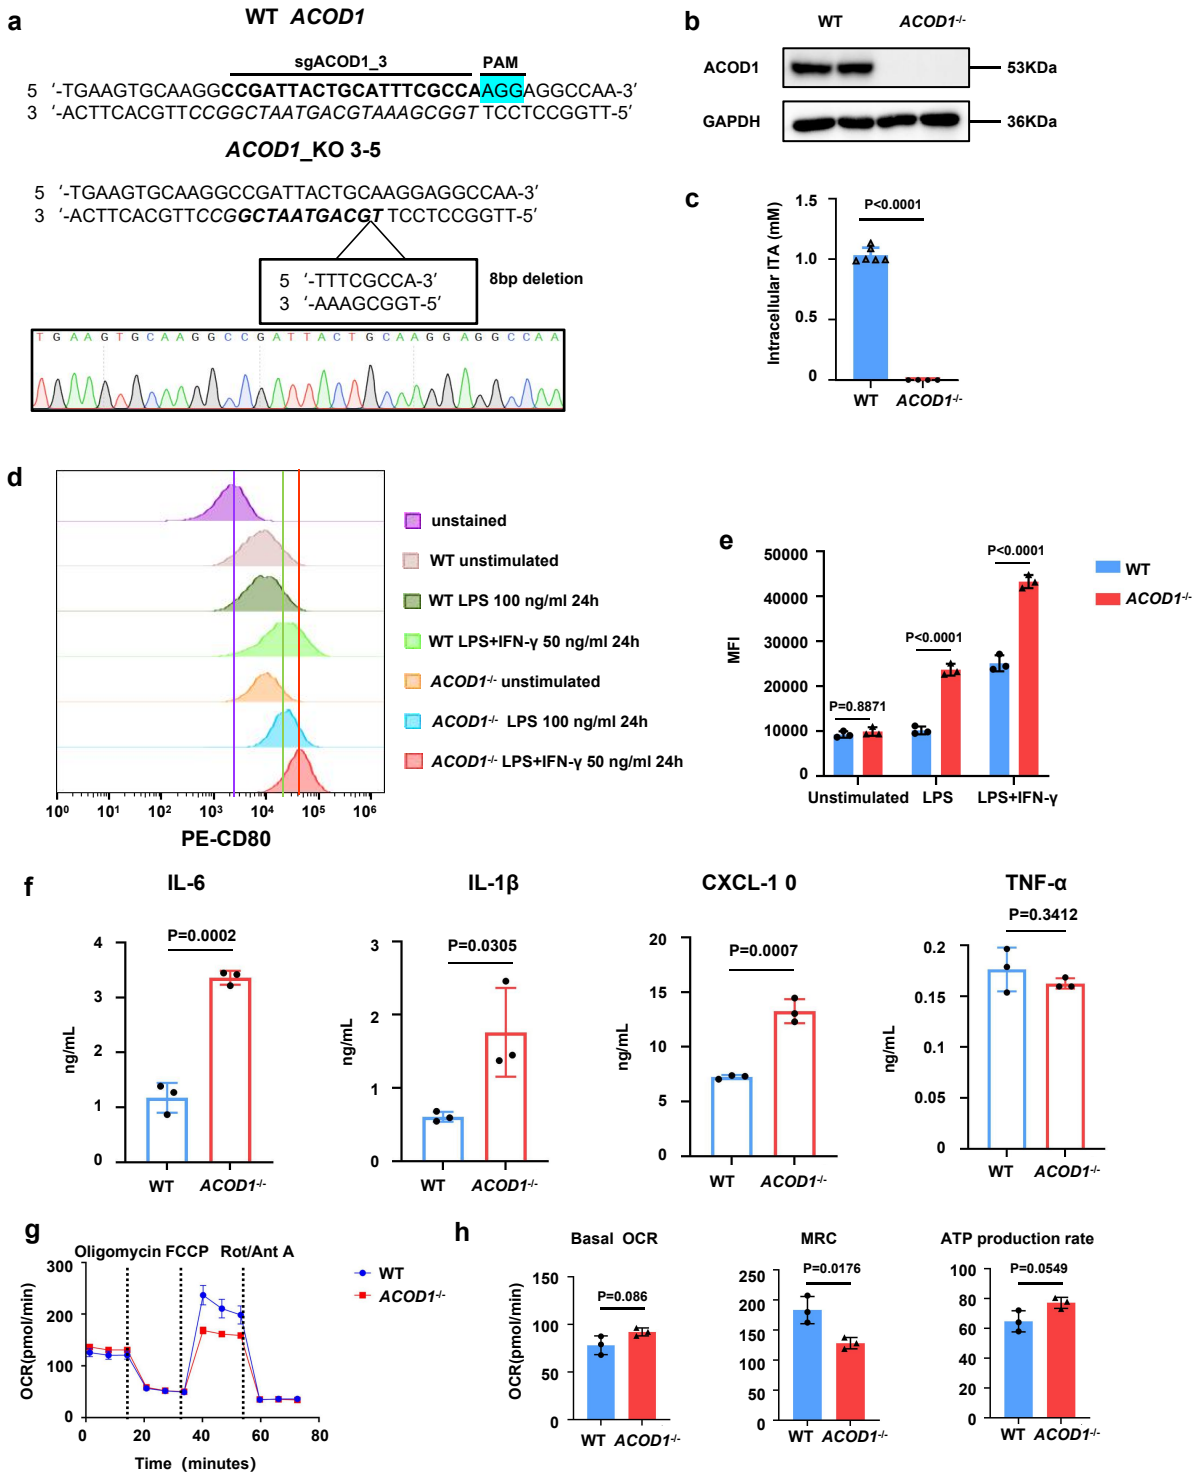

**Fig.3 | *ACOD1*-deleted human iPSC-derived macrophages demonstrated enhanced pro-inflammatory activation.** **a**, Comparison of the DNA sequence in the *ACOD1* knockout iPSC clone (by Sanger sequencing) with the *ACOD1* WT DNA sequence showed an 8 bp deletion in the sgRNA targeted region. **b**, Western blotting for *ACOD1* expression in WT and *ACOD1*<sup>-/-</sup> iMACs after LPS and IFN- $\gamma$  stimulation for 24 h. **c**, Mass spectrometry quantification of the cellular itaconate (ITA) concentration in WT and *ACOD1*<sup>-/-</sup> iMACs after LPS and IFN- $\gamma$  stimulation for 24 h (WT, n=6; *ACOD1*<sup>-/-</sup>, n=4). **d,e**, CD80 expression on WT and *ACOD1*<sup>-/-</sup> iMACs and mean fluorescence intensity (MFI) quantification was determined by flow cytometry under different treatments, including 100 or 50 ng/mL LPS plus 50 ng/mL IFN- $\gamma$  stimulation for 24 h (e, n=3). **f**, The levels of the indicated cytokines/chemokines in the medium of iMAC culturing were determined 24 h post IFN- $\gamma$  and LPS challenge (n=3). **g**, Seahorse extracellular metabolic flux analysis of oxygen consumption rates (OCRs). LPS and IFN- $\gamma$  stimulated WT or *ACOD1*<sup>-/-</sup> iMACs were sequentially treated with oligomycin (1.5  $\mu$ M), fluorocarbonylcyanide phenylhydrazine (FCCP; 2  $\mu$ M), and rotenone and antimycin A (0.5  $\mu$ M each) (n=3). **h**, Basal OCR, maximal respiration capacity (MRC), and ATP production rate were calculated with Wave 2.4.0. (n=3 biological replicates representative of three independent experiments). **c**, **e**, **f**, **g** and **h**, Data was shown as mean  $\pm$  SD. Statistics by two-way ANOVA test (**e**) or unpaired t test (**c,f,h**).

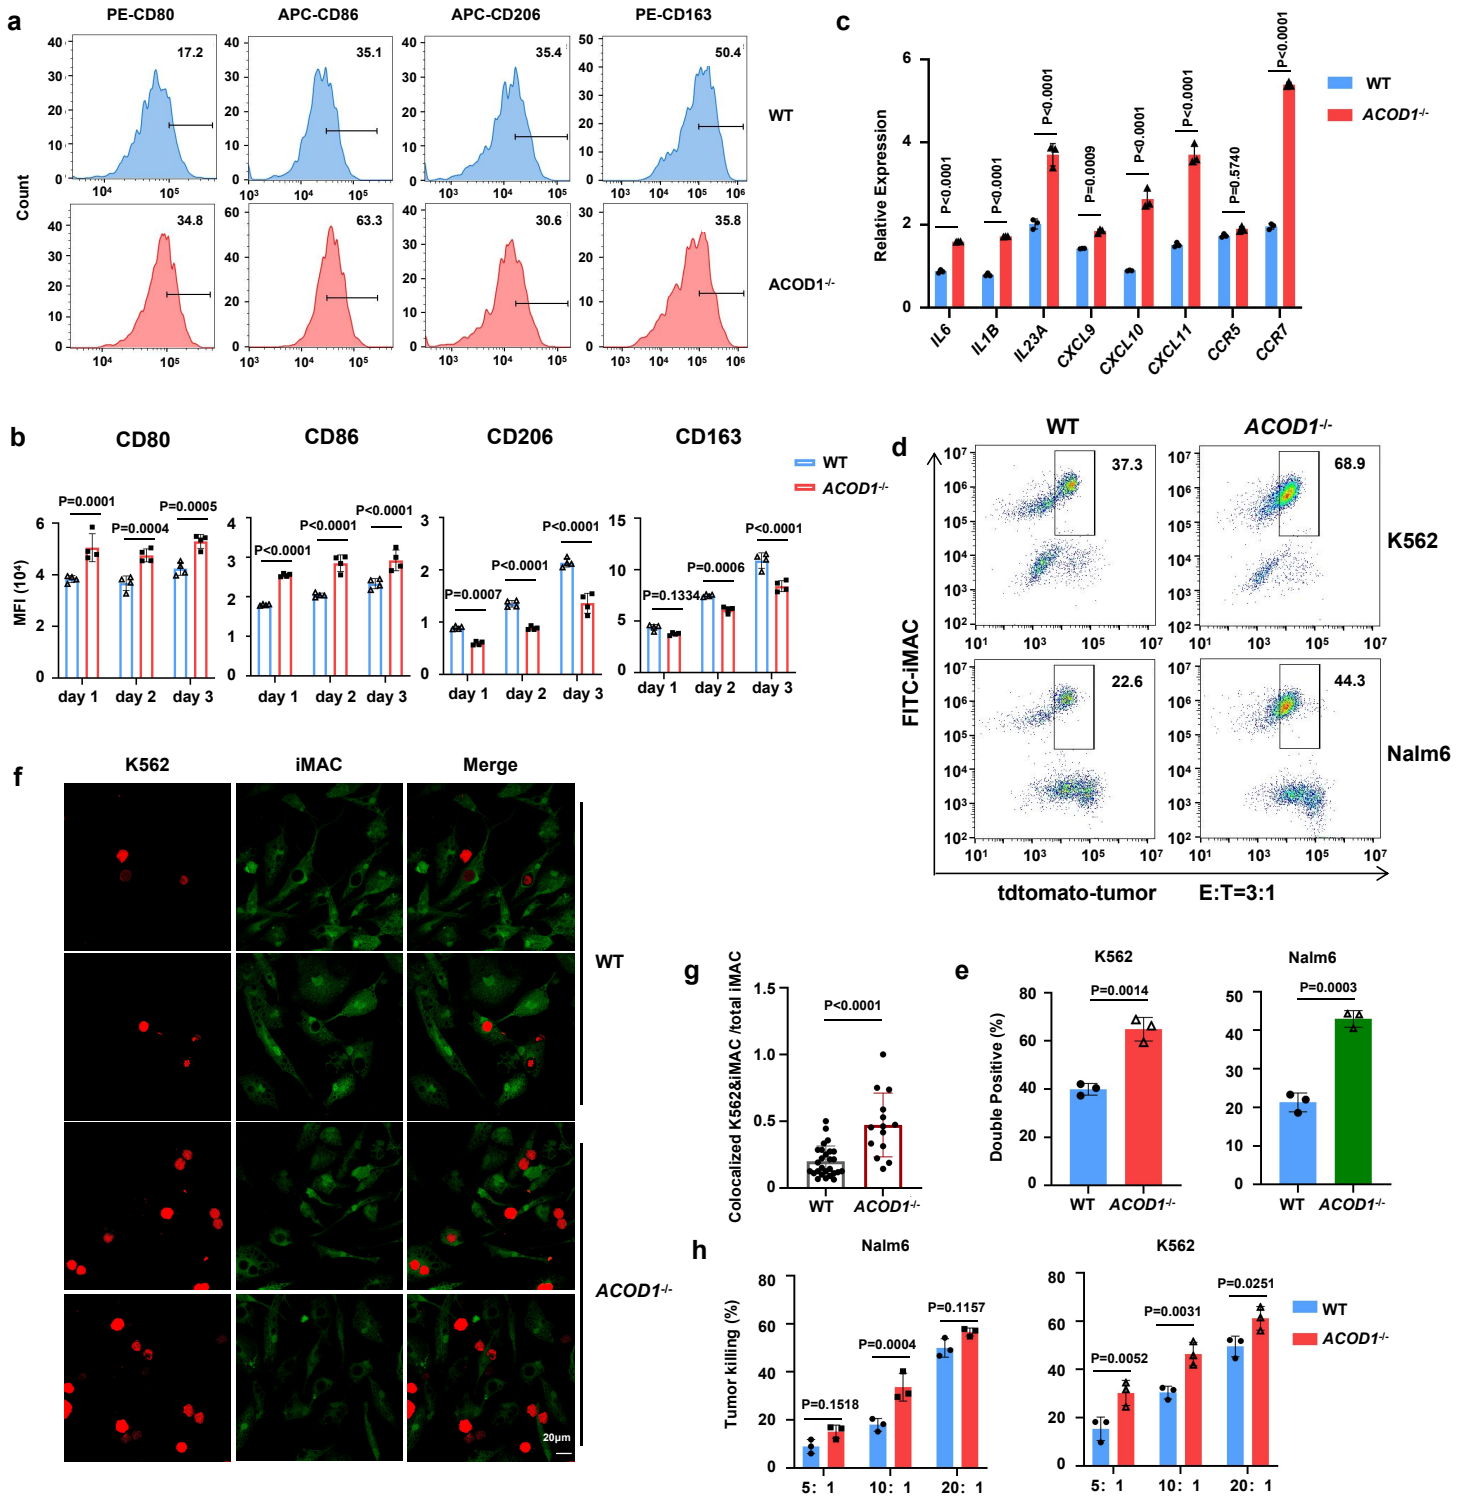



**Fig. 4 | *ACOD1*<sup>-/-</sup> iMACs had stronger phagocytosis and anti-cancer cell function.** **a**, CD80, CD86, CD163, and CD206 expression in WT or *ACOD1*<sup>-/-</sup> iMACs after co-cultured with Nalm6 (E: T=5:1) for 24 h were measured by flow cytometry and displayed as histograms. **b**, Quantification of MFI measured by flow cytometry after co-cultured with Nalm6 (E: T=5:1) for 24 h (day 1), 48 h (day 2), or 72 h (day 3) (n=4). **c**, qRT-PCR for mRNA expression of pro-inflammatory genes in WT and *ACOD1*<sup>-/-</sup> iMACs after co-cultured with Nalm6 (E: T=5:1) for 24 h (n=3). **d,e**, Representative flow cytometry plots and quantification of double positive iMACs after WT and *ACOD1*<sup>-/-</sup> iMACs were co-cultured with Nalm6 and K562 cells (E: T=3:1) for 24 h (e, n=3). **f,g**, Representative confocal images and quantification of K562 cells phagocytosed by WT or *ACOD1*<sup>-/-</sup> iMACs after co-cultured for 24 h (g, WT, n=27; *ACOD1*<sup>-/-</sup>, n=14). The number of colocalized K562&iMAC and total iMAC in one view was used to calculate the ratio. **h**, Luciferase assays showing iMAC cytotoxicity against cancer cells when co-cultured with Nalm6 or K562 cells for 24 h (E: T=5:1, 10:1, or 20:1) (n=3). The luciferase gene has been expressed in tumor cells, so live tumor cells could express luciferase, thus their viability can be measured by D-luciferin sodium salt in a luciferase assay. **b, c, g, e** and **h**, Data was shown as mean ± SD. Statistics by two-way ANOVA test (b and h), unpaired t test (g and e).

Fig. 5

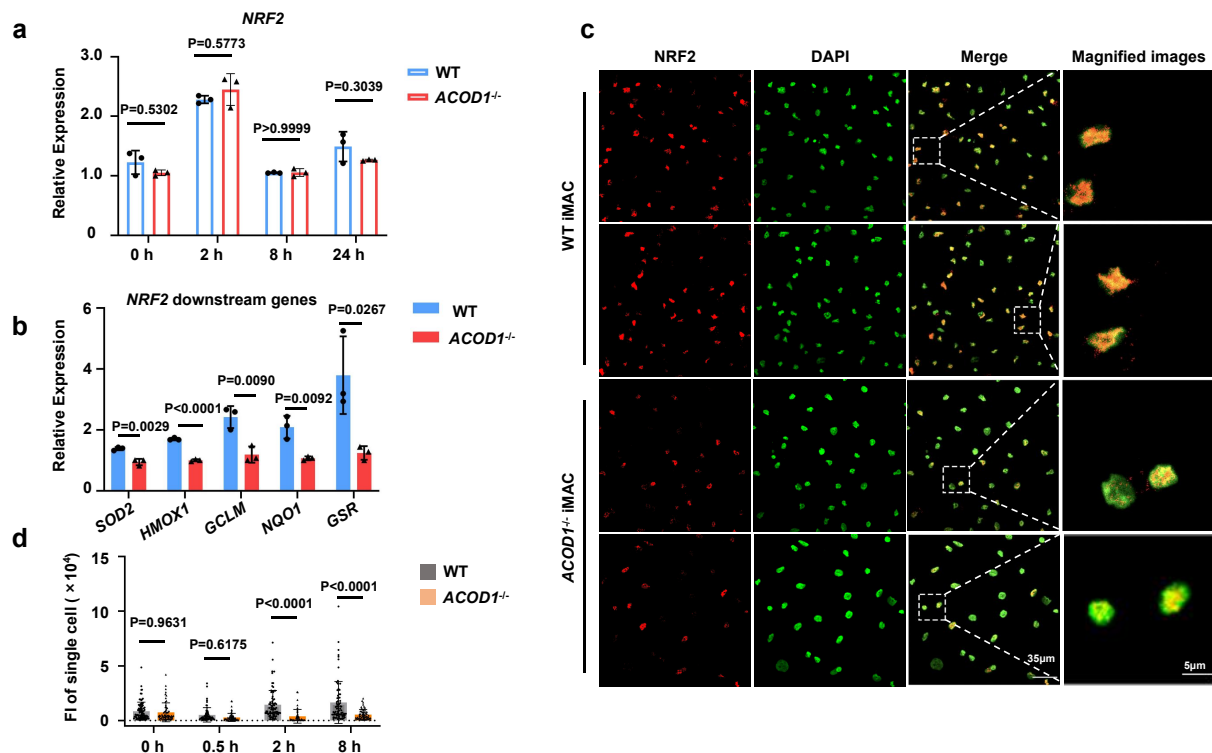

**Fig. 5 | *ACOD1* deletion decreased nucleolar NRF2 protein expression and its activity in iMACs. a**, qRT-PCR for mRNA expression of NRF2 in WT and *ACOD1*<sup>-/-</sup> iMACs after LPS and IFN- $\gamma$  stimulation for 2, 8, or 24 h (n=3). **b**, qRT-PCR for mRNA expression of NRF2 downstream genes in WT and *ACOD1*<sup>-/-</sup> iMACs after LPS and IFN- $\gamma$  stimulation for 24 h (n=3). **c,d**, Representative confocal images and quantification of the NRF2 protein in WT and *ACOD1*<sup>-/-</sup> iMACs after LPS and IFN- $\gamma$  stimulation for 2 h (d, n=60). **a,b** and **d**, Data was shown as mean  $\pm$  SD. Statistics by two-way ANOVA test.

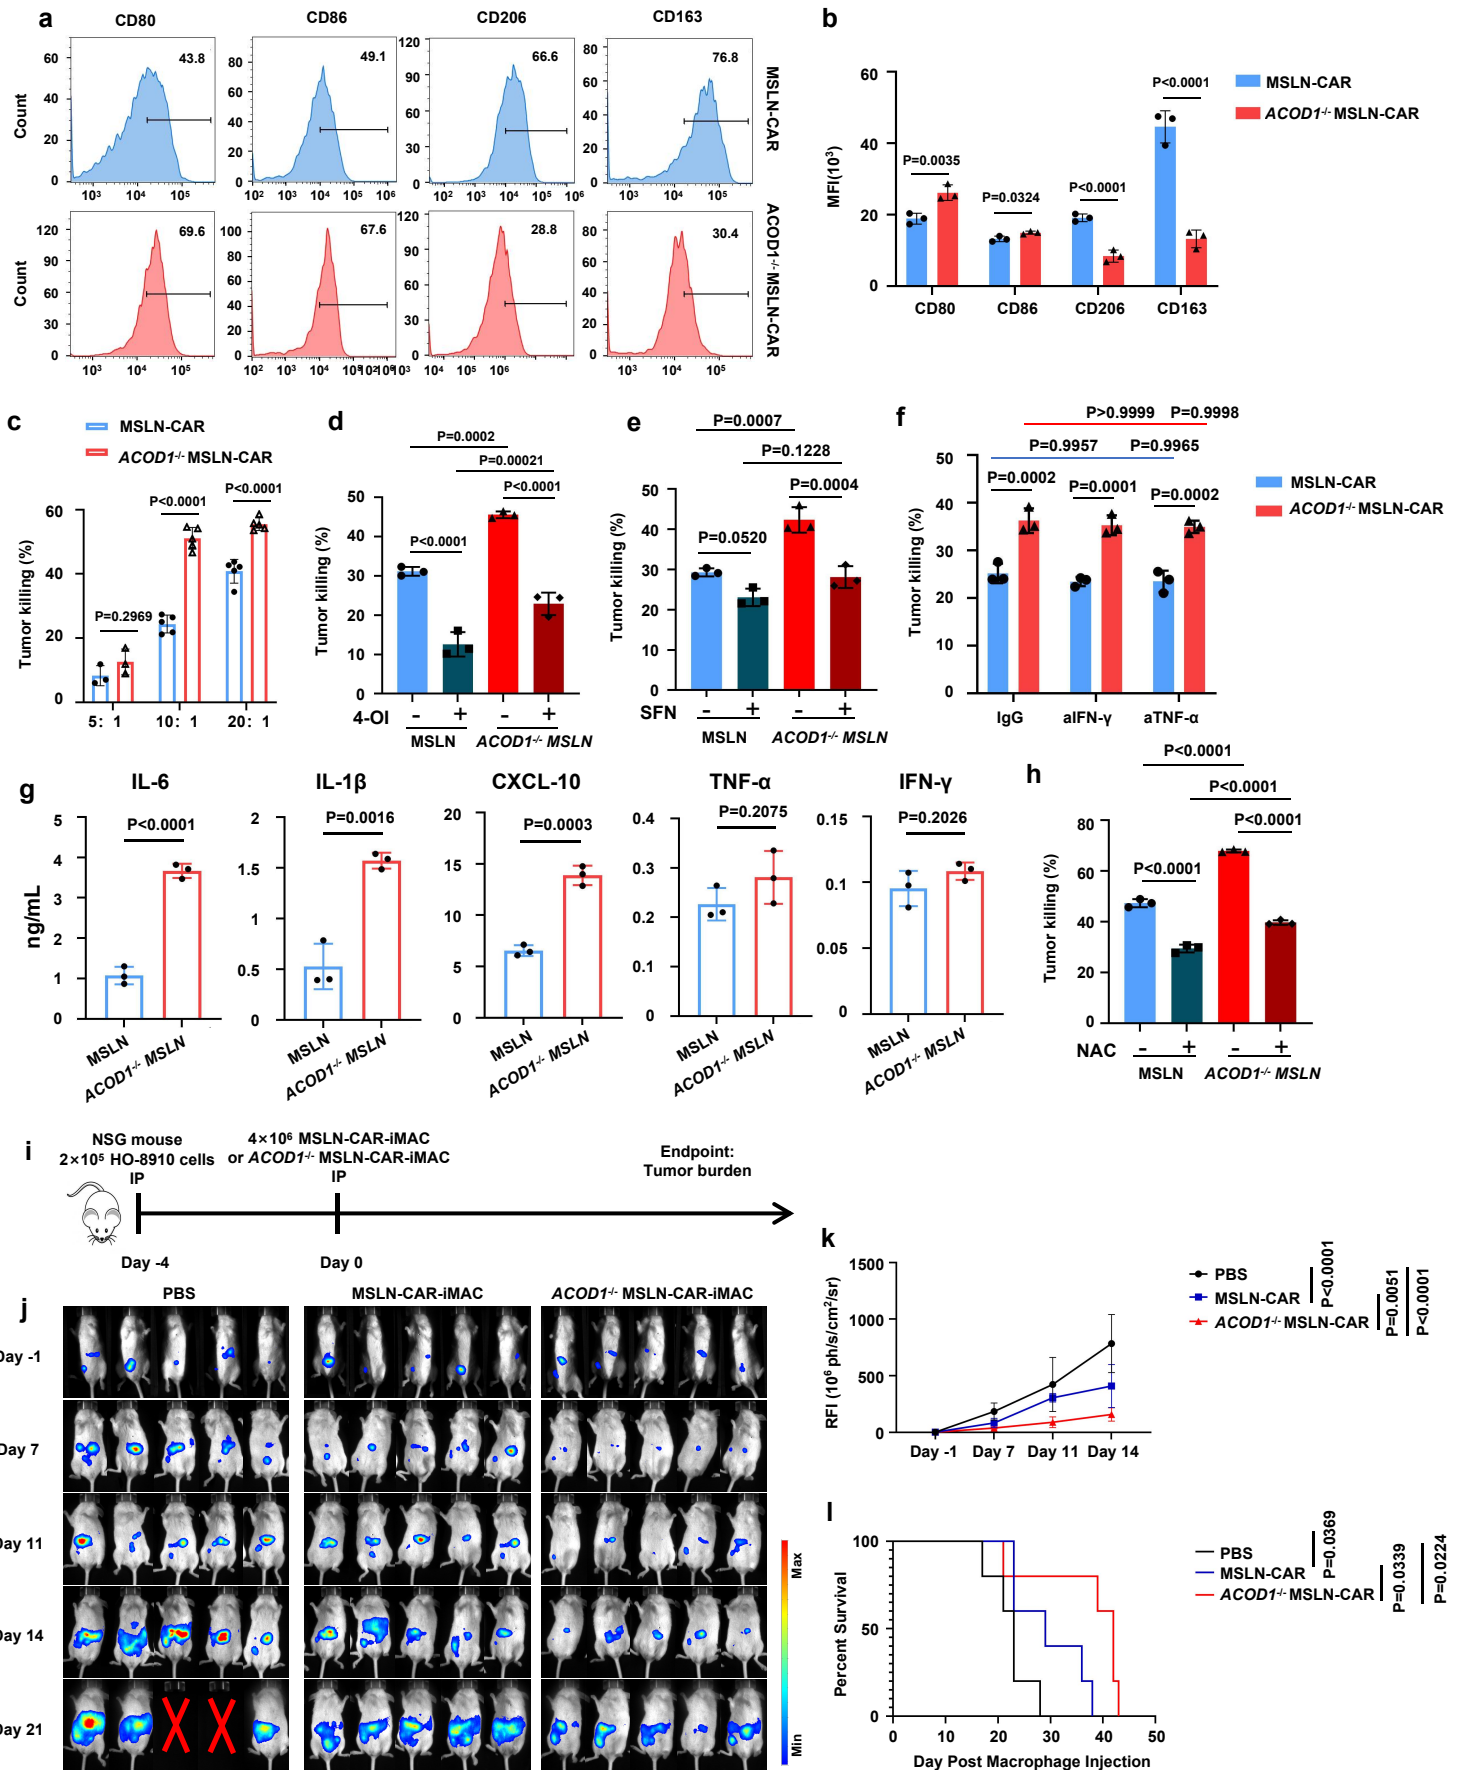

**Fig. 6 | ACOD1 deletion promoted anti-cancer cell activity of iMACs against solid tumors *in vitro* and *in vivo*.** **a,b**, The expression and quantification of CD80, CD86, CD163, and CD206 in MSLN or *ACOD1*<sup>-/-</sup> MSLN CAR-iMACs after co-cultured with HO-8910 cells (E: T=5:1) for 24 h were measured by flow cytometry and displayed as histograms (b, n=3). **c**, Luciferase assays for CAR-iMAC cytotoxicity activity against cancer cells when co-cultured with HO-8910 cells for 24 h (E: T=5:1, 10:1, or 20:1) (5:1, n=3; 10:1, n=5; 20:1, n=5). **d**, iMACs were pre-treated with 4-OI (250  $\mu$ M) or DMSO control for 3 h before challenge of 24 h with LPS plus IFN- $\gamma$  (50 ng/mL each). Luciferase assays for CAR-iMAC cytotoxicity activity against cancer cells with or without 4-OI addition when co-cultured with HO-8910 cells for 24 h (n=3) (E: T=10:1). **e**, Luciferase assays for MSLN-CAR-iMAC cytotoxicity activity against cancer cells with or without SFN (10  $\mu$ M) addition when co-cultured with HO-8910 cells for 24 h (E: T=10:1) (n=3). **f**, The supernatant was collected after iMAC co-cultured with HO-8910 cells for 24 h (E: T=10:1). Luciferase assays for the cytotoxicity activity of the co-culture supernatant with IgG control, neutralizing antibody (10  $\mu$ g/mL) of IFN- $\gamma$  or TNF- $\alpha$  (n=3). **g**, The levels of the indicated cytokines/chemokines in the medium of iMAC-HO-8910 co-culture system were determined 24 h post IFN- $\gamma$  and LPS challenge (n=3). **h**, Luciferase assays for MSLN-CAR-iMAC cytotoxicity activity against cancer cells with or without NAC (2.5 mM) addition when co-cultured with HO-8910 cells for 48 h (E: T=10:1) (n=3). **(b-h)** Data was shown as mean  $\pm$  SD. **(b, c, d, e, f, h)** Statistics by two-way ANOVA test. **g**, Statistics by unpaired t test. **i**, A diagram of the *in vivo* treatment scheme. **j**, IVIS images showing progression of tumor in the above conditions (n=5 per group). **k**, Tumor burden on day -1, 7, 11, and 14 was quantified and displayed as mean  $\pm$  SD. statistics by two-way ANOVA test. **l**, The Kaplan-Meier curve demonstrating survival of the mice. Statistics by two-tailed log-rank test.

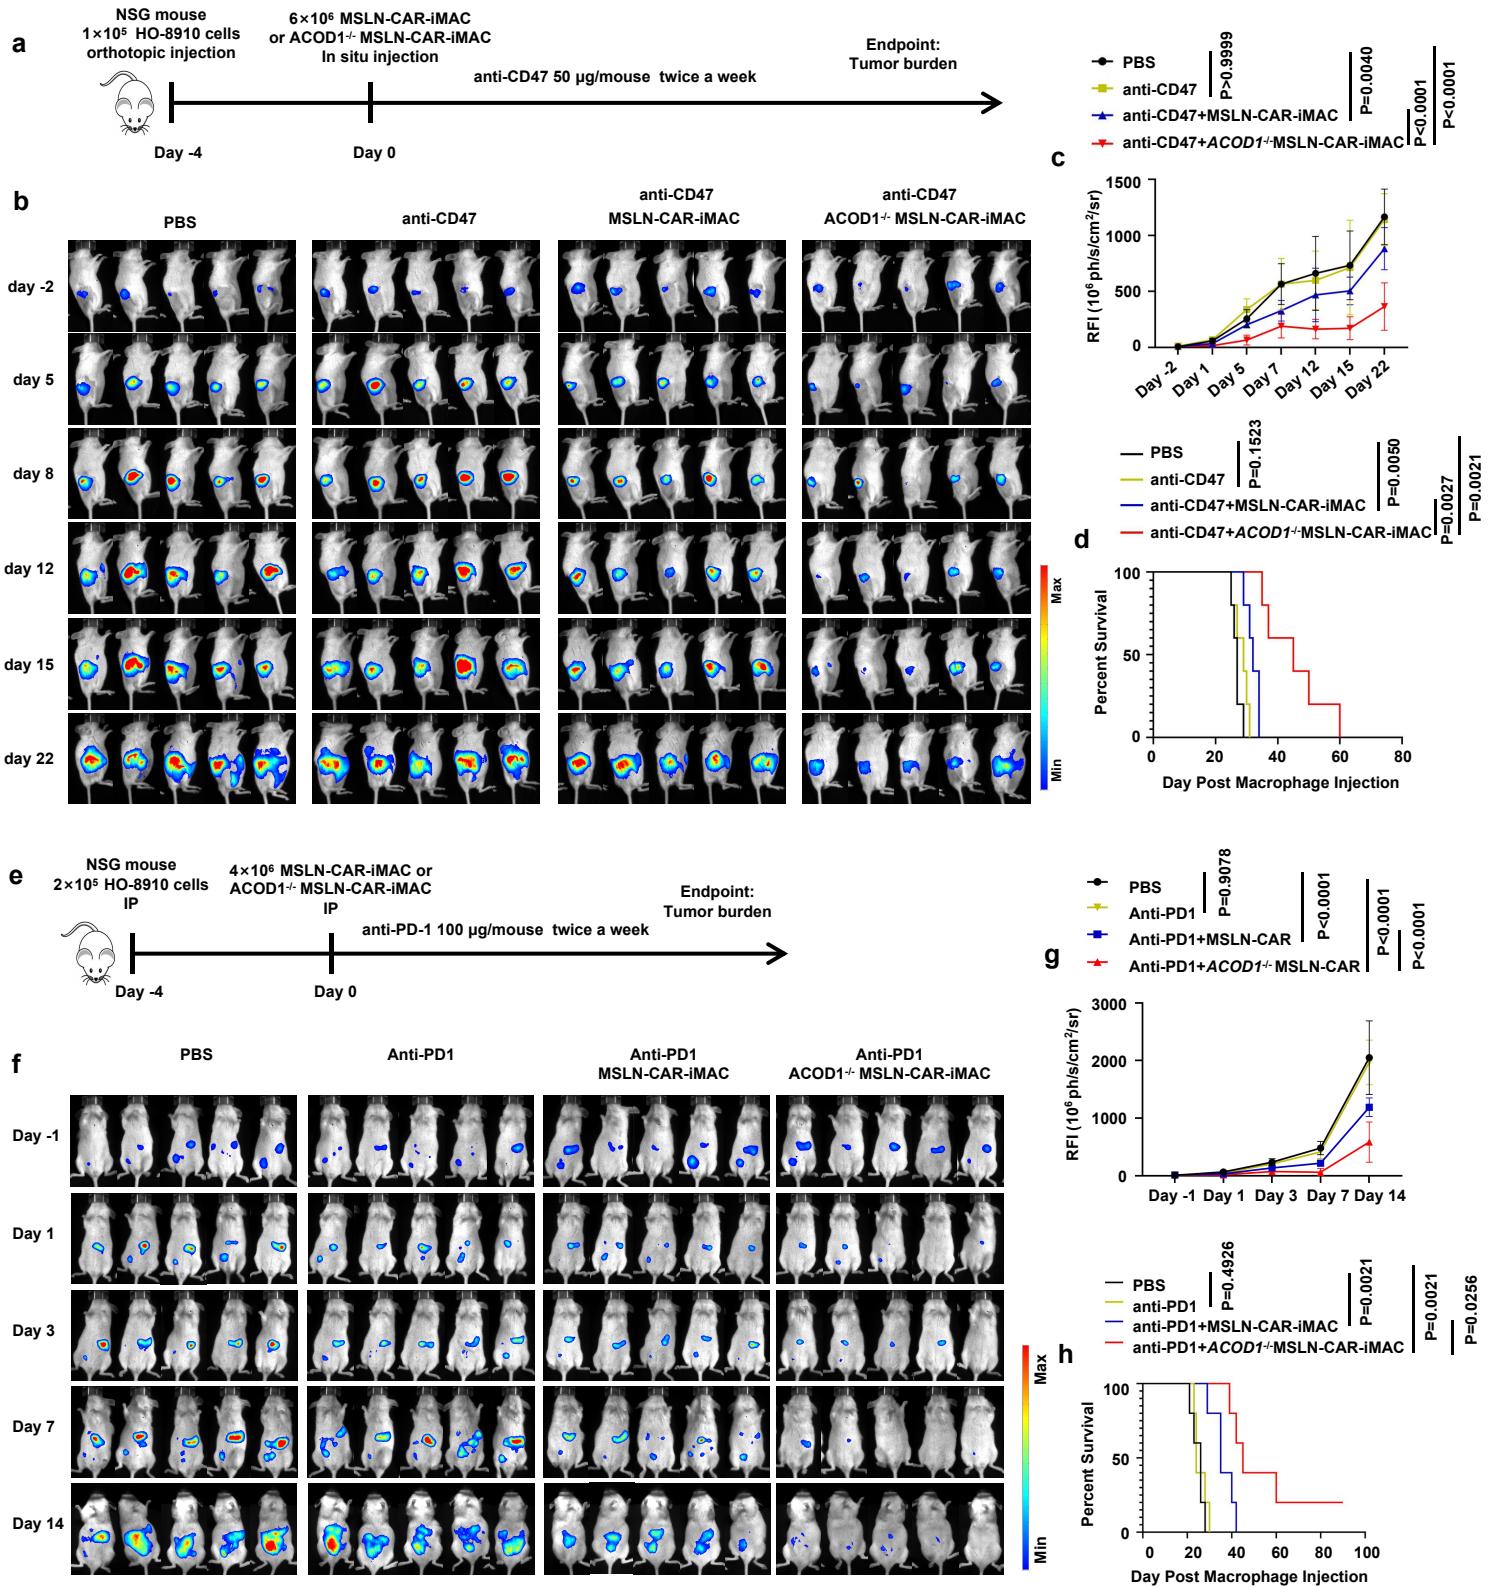

**Fig. 7 | *ACOD1* deletion promoted anti-ovarian cancer activity of iMACs combining with ICIs *in vivo*.** **a**, A schematic of the *in vivo* study using HO-8910 cells for a mouse ovarian orthotopic injection model treated with MSLN-CAR-iMACs and *ACOD1*<sup>-/-</sup> MSLN-CAR-iMACs, and combined with an anti-CD47 antibody. **b**, Tumor burden was determined by BLI. Images of representative time points were shown (n=5 per group). **c**, Quantification of tumor burden of representative time points was displayed as mean  $\pm$  SD. Statistics by two-way ANOVA test. **d**, The Kaplan-Meier curve demonstrating survival of the mice. Statistics by two-tailed log-rank test. **e**, A schematic of the *in vivo* study using HO-8910 cells for a mouse intraperitoneal injection model treated with MSLN-CAR-iMACs and *ACOD1*<sup>-/-</sup> MSLN-CAR-iMACs, and combined with an anti-PD1 antibody. **f**, Tumor burden was determined by BLI. Images of representative time points were shown (n=5 per group). **g**, Quantification of tumor burden of representative time points was displayed as mean  $\pm$  SD. Statistics by two-way ANOVA test. **h**, The Kaplan-Meier curve demonstrating survival of the mice. Statistics by two-tailed log-rank test.



# Extended Data Fig. 1

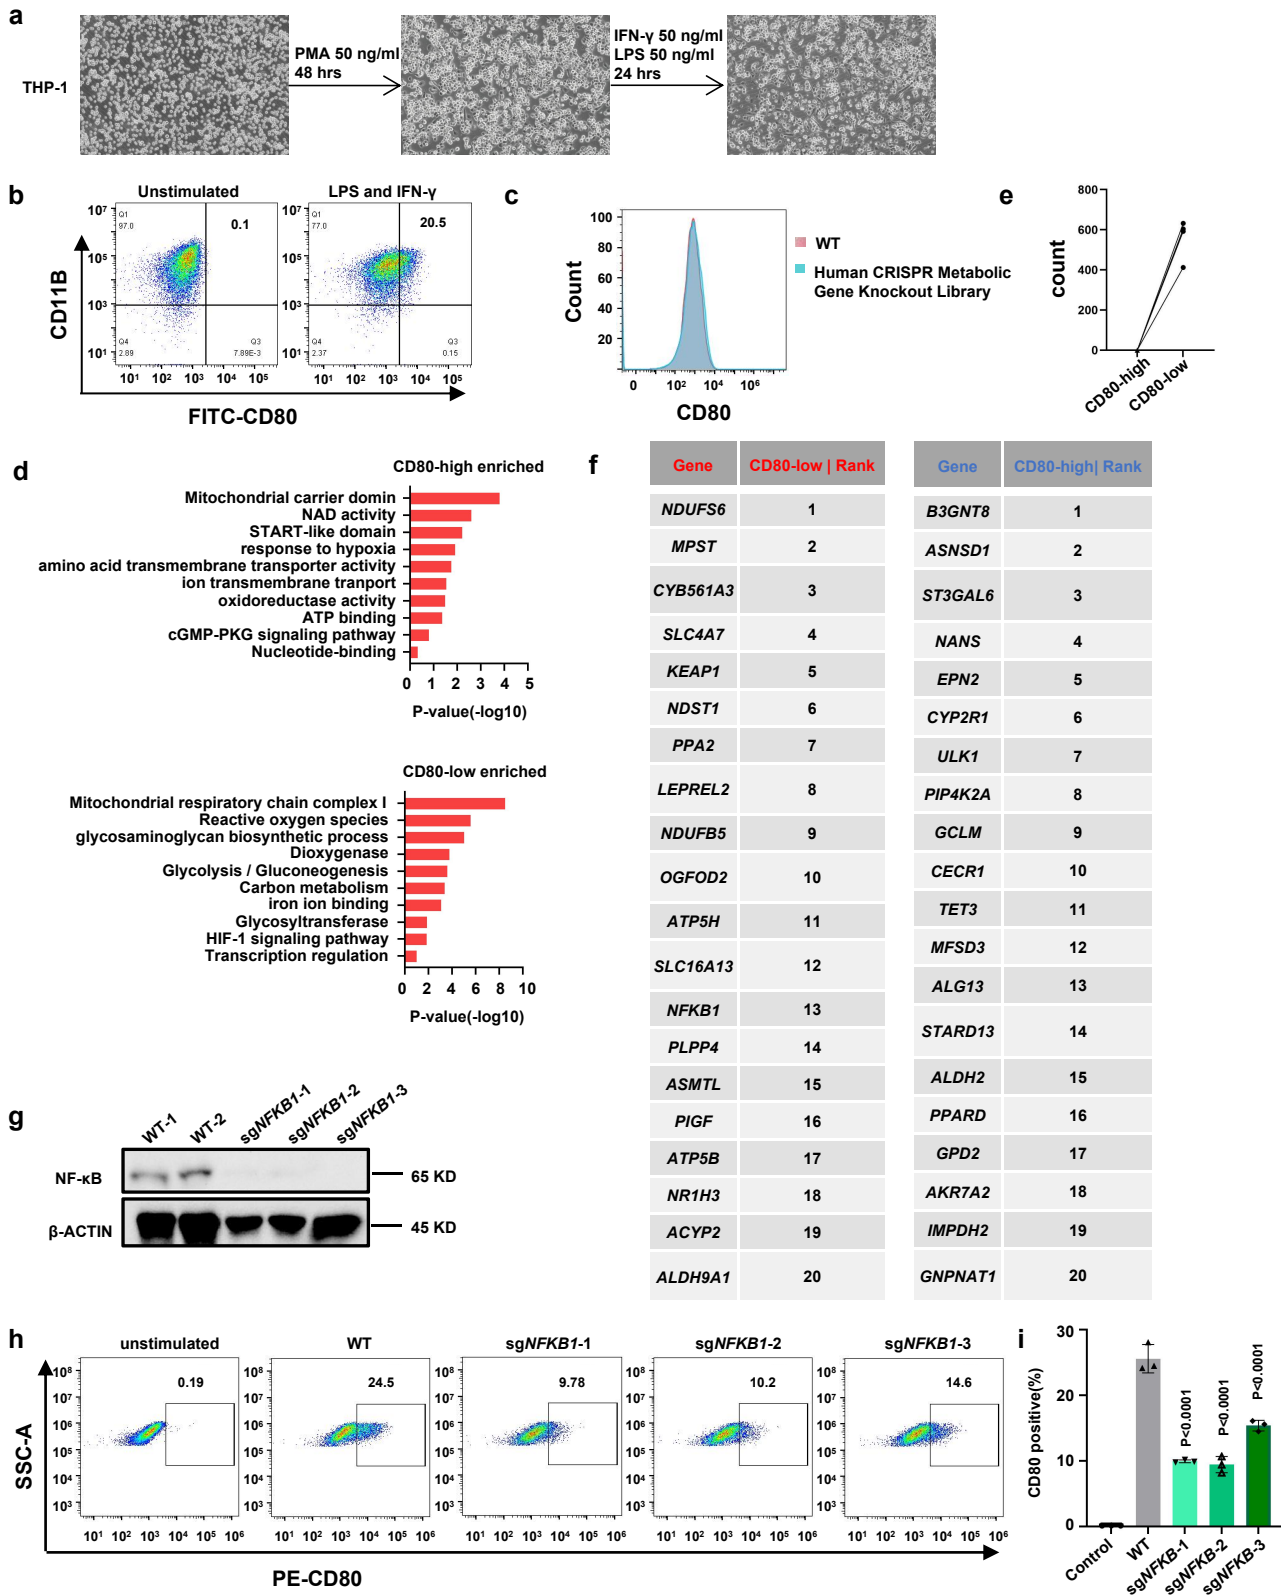

**Extended Data Fig. 1 | Identifying the metabolic genes involved in human macrophage activation,** related to **Fig. 1.** **a**, Microscopic pictures showing THP-1 cell differentiation and polarization. **b**, Flow cytometry plots and percentage of CD80 expression on WT tMACs with or without LPS and IFN- $\gamma$  stimulation for 24 h. **c**, WT and human Metabolic Gene CRISPR Library virus-infected THP-1 cells were differentiated into macrophages, and CD80 expression was measured by flow cytometry and demonstrated as histograms. **d**, GO term enrichment analysis with enriched sgRNA-targeted genes in CD80-high population (up), and CD80-low population (down). **e**, Counts of sgRNAs targeting *KEAP1* detected in the CD80-high and CD80-low samples. **f**, Top 20 sgRNA-targeted genes enriched in the CD80-low populations and CD80-high populations identified by the CRISPR Screen in tMACs. **g**, The protein level of NF- $\kappa$ B in WT and *NFKB1*-depleted THP-1 cells. **h,i**, Flow cytometry plots and quantification of CD80 expression on unstained, unstimulated, WT and *NFKB1*-depleted tMACs (i, n=3). Statistics by one-way ANOVA test.

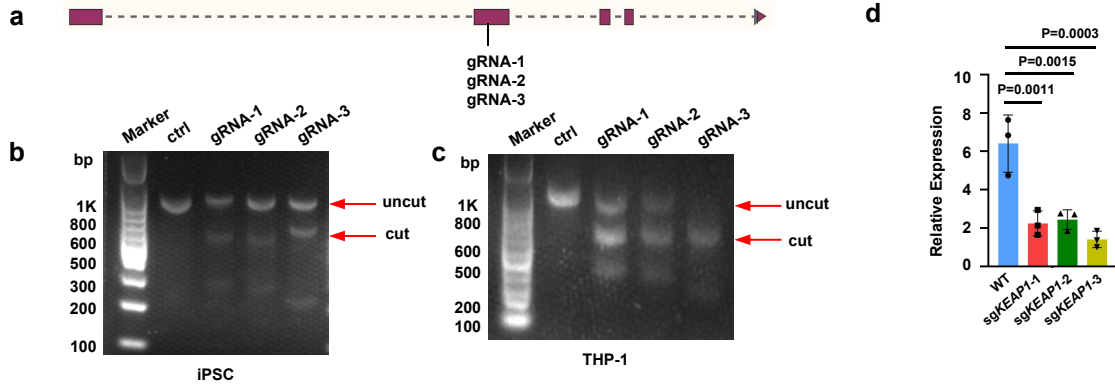

**Extended Data Fig. 2 | *KEAP1* deletion in THP-1 cells**, related to **Fig. 1. a**, CRISPR-Cas9-mediated *KEAP1* KO using three sgRNAs targeting exon 2 of the *KEAP1* gene. **b,c**, Validation of DNA cleavage efficiency by T7 endonuclease assays in iPSCs (**b**) and THP-1 cells (**c**). **d**, Relative expression of *KEAP1* in WT and sg*KEAP1* transfected tMACs (n=3). Data was shown as mean  $\pm$  SD. Statistics by one-way ANOVA test.

## Extended Data Fig. 3

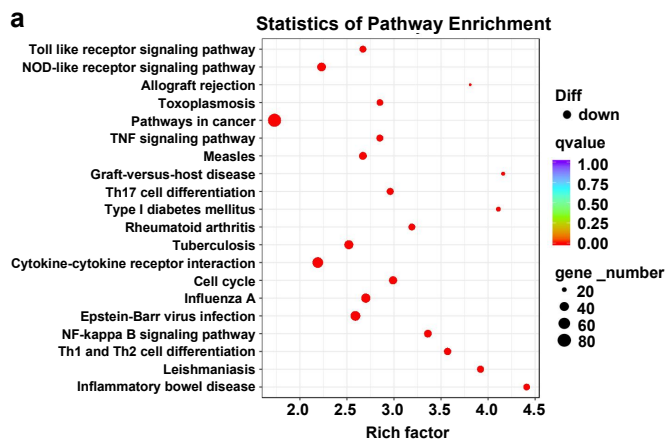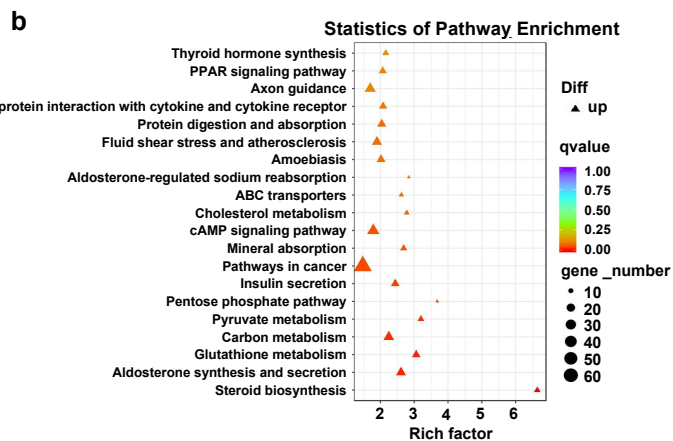

**Extended Data Fig. 3 | Pathway enrichment in *KEAP1*-deleted macrophages**, related to **Fig. 1. a,b**, Top enriched gene sets down-regulated (**a**) or up-regulated (**b**) in sg*KEAP1*-3-transduced tMACs compared to sgControl-transduced cells after LPS and IFN- $\gamma$  stimulation for 8 h.

## Extended Data Fig. 4

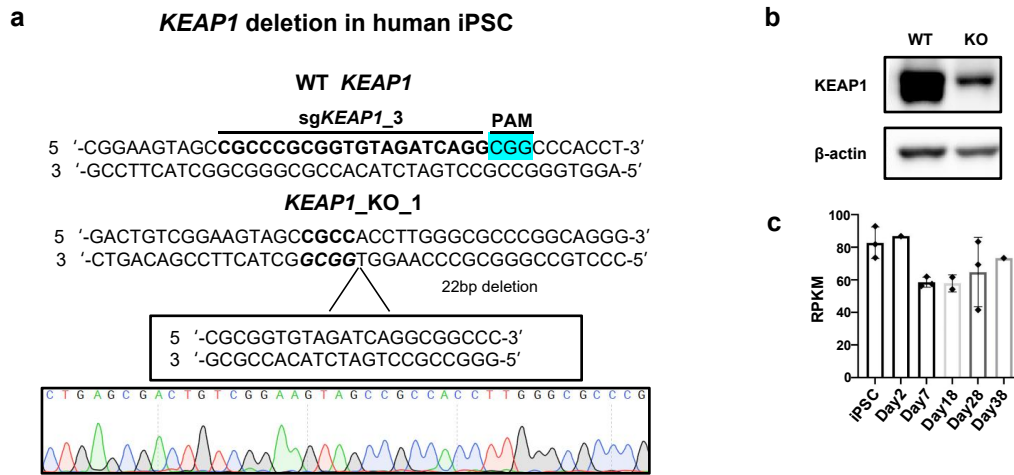



**Extended Data Fig. 4 | KEAP1 deletion in human iPSCs**, related to **Fig. 1. a**, Comparison of the DNA sequence in the *KEAP1* KO iPSC clone (by Sanger sequencing) with *KEAP1* WT sequence, revealing a 22 bp deletion in the gRNA targeted region. **b**, The protein expression of KEAP1 in WT and *KEAP1* KO iPSCs was evaluated by western blotting. **c**, RNA-seq data for the expression of *KEAP1* in iPSCs and differentiated cells on day 2, 7, 18, 28, and 38 (iPSC, n=3; Day 2, n=1; Day 7, n=3; Day 18, n=2; Day 28, n=3; Day 38, n=1). Data was shown as mean  $\pm$  SD.

## Extended Data Fig. 5

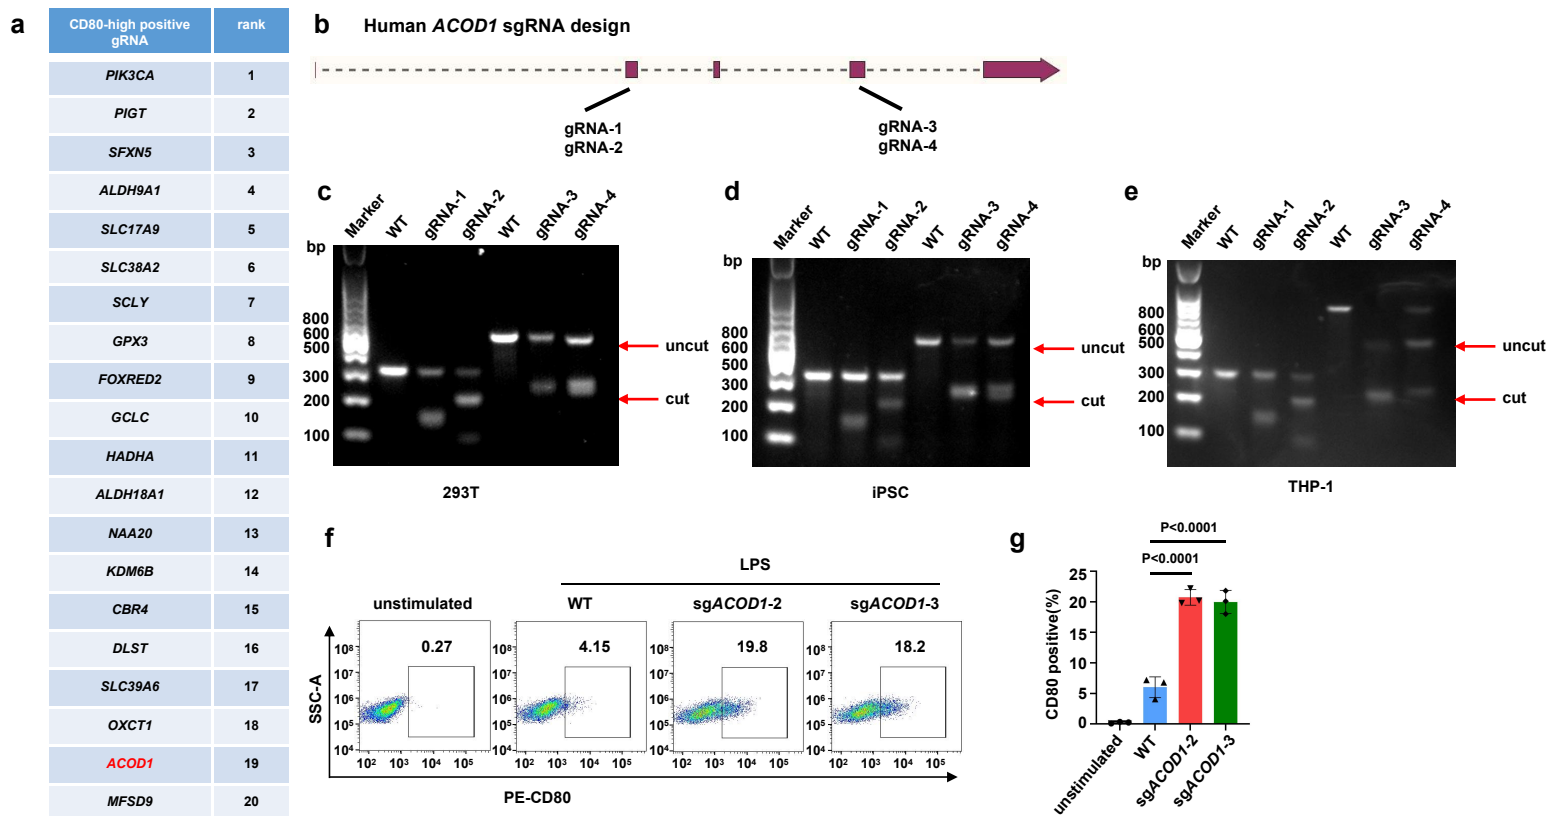

**Extended Data Fig. 5 | *ACOD1* deletion in human macrophages resulted in enhanced pro-inflammation activation**, related to **Fig. 2**. **a**, Top 20 sgRNA targeted genes enriched in the CD80-high population identified by a CRISPR Screen in iPSC-derived macrophages. **b-e**, CRISPR/Cas9-mediated *ACOD1* knockout using four sgRNAs located in exons 2 and 4 of the *ACOD1* gene, and validation of DNA cleavage efficiency by T7 endonuclease assays in 293T (**c**), iPSC (**d**), and THP-1 cells (**e**). **f,g**, Flow cytometry plots and quantification of CD80 expression in unstimulated, WT, and sg*ACOD1* transduced tMACs with 50 ng/mL LPS stimulation for 24 h (g, n=3). Data was shown as mean  $\pm$  SD. Statistics by one-way ANOVA test.

## Extended Data Fig. 6

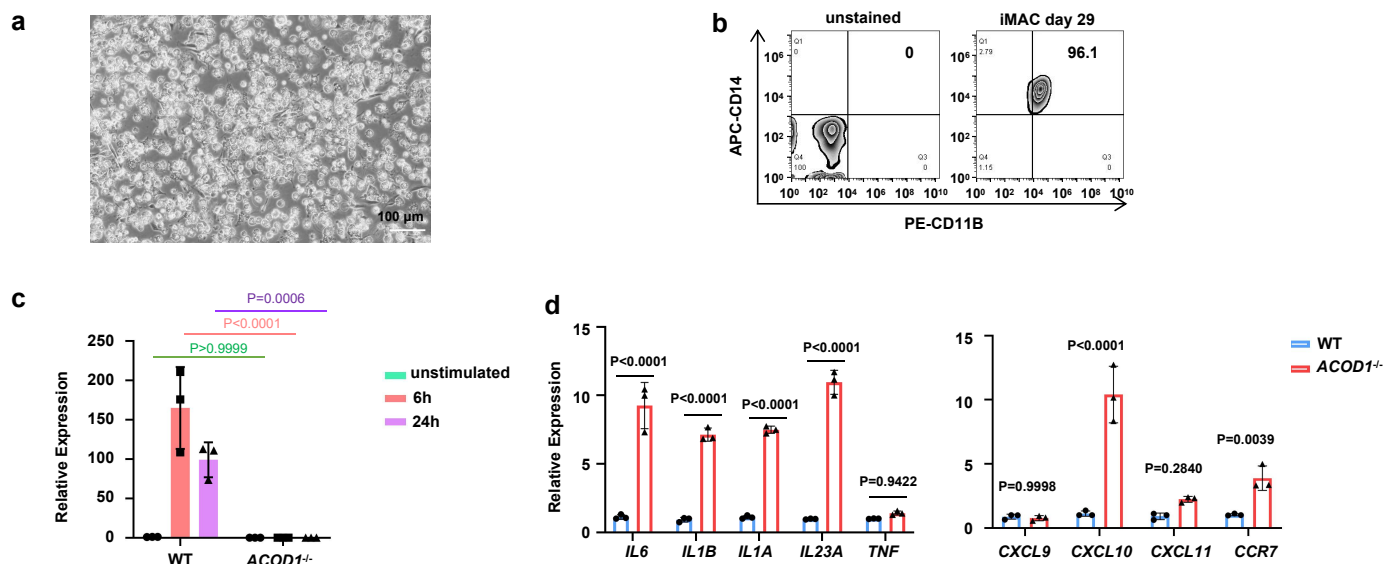

**Extended Data Fig. 6 | *ACOD1* deletion resulted in elevated pro-inflammatory gene expression in iMACs,** related to **Fig. 3.** **a**, Representative images of differentiated iMACs at day 29. **b**, CD14 and CD11B expression on iMACs at day 29 was determined by flow cytometry. **c**, The relative expression of *ACOD1* in WT and *ACOD1*<sup>-/-</sup> iMACs with the indicated treatments, including unstimulated, and 50 ng/mL LPS plus 50 ng/mL IFN- $\gamma$  stimulation for 6 and 24 h (n=3). **d**, qRT-PCR for mRNA expression of pro-inflammatory genes and anti-inflammatory genes in WT and *ACOD1*<sup>-/-</sup> iMACs after LPS and IFN- $\gamma$  stimulation for 24 h (n=3). **c,d**, Data was shown as mean  $\pm$  SD. Statistics by two-way ANOVA test.

## Extended Data Fig. 7

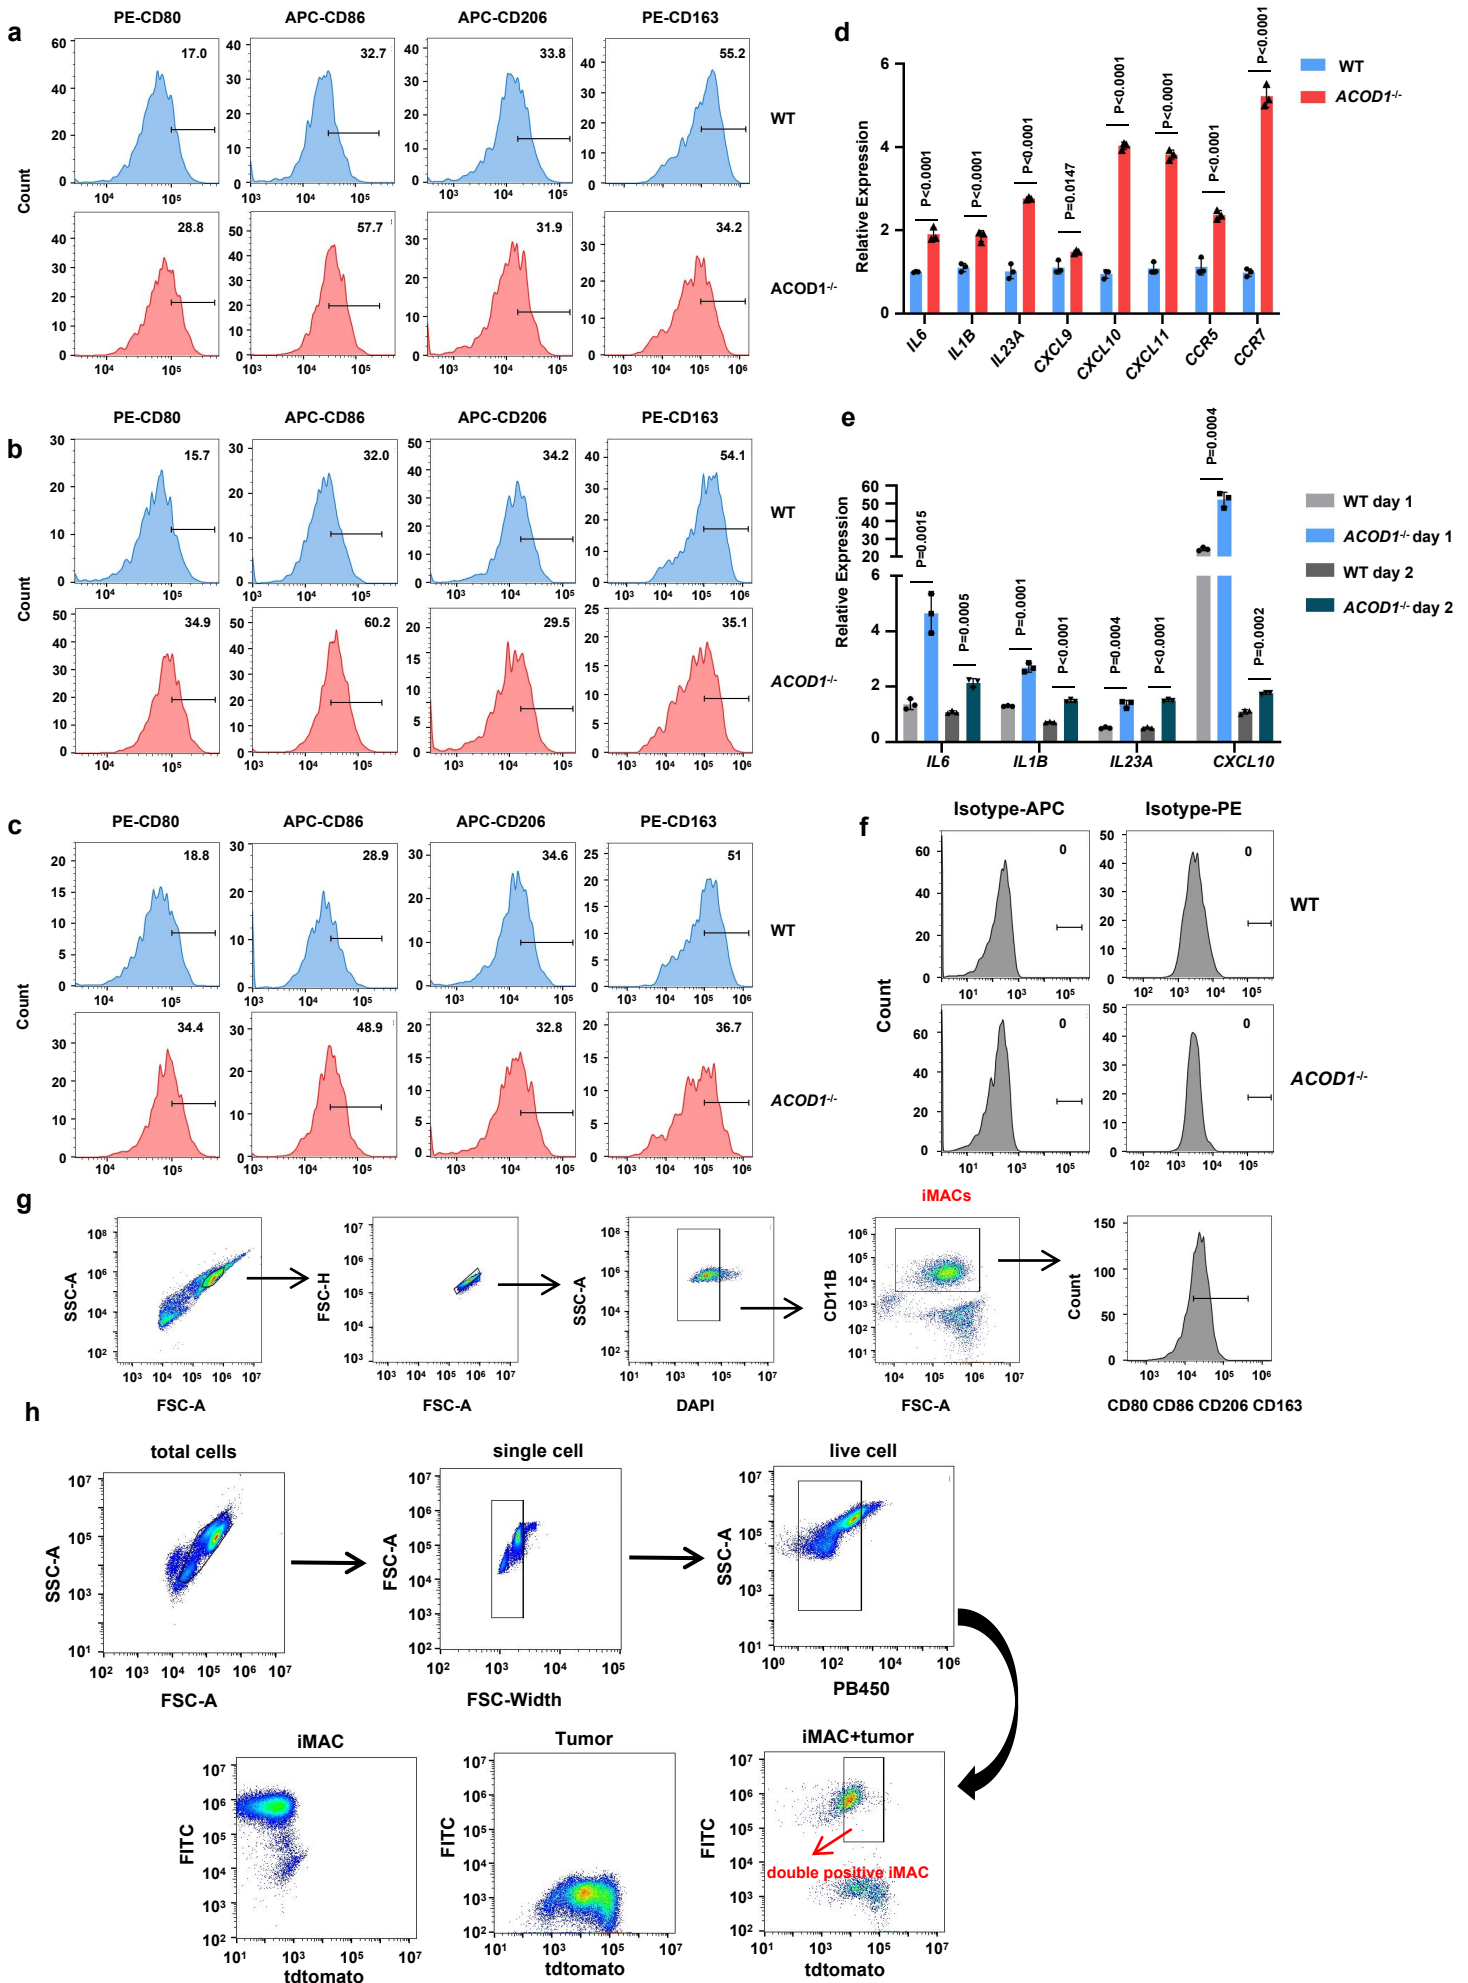

**Extended Data Fig. 7 | *ACOD1*<sup>-/-</sup> iMACs exhibited increased pro-inflammatory activation when co-cultured with tumor cells**, related to **Fig. 4. a-c**, The expressions of CD80, CD86, CD163, and CD206 in WT or *ACOD1*<sup>-/-</sup> iMACs after co-cultured with **(a)** Nalm6 (E:T=3:1), **(b)** K562 (E:T=5:1) or **(c)** K562 (E:T=3:1) for 24 h measured by flow cytometry and displayed as histograms. **d**, qRT-PCR for mRNA expression of pro-inflammatory genes in WT and *ACOD1*<sup>-/-</sup> iMACs after co-culture with Nalm6 (E:T=3:1) for 24 h (n=3). Data was shown as mean ± SD. **e**, qRT-PCR for mRNA expression of pro-inflammatory genes in WT and *ACOD1*<sup>-/-</sup> iMACs after co-culture with Nalm6 (E:T=5:1) for 24 h (day 1) or 48 h (day 2) (n=3). Data was shown as mean ± SD. Statistics by two-way ANOVA test. **f**. WT or *ACOD1*<sup>-/-</sup> iMACs were stained by APC or PE isotype and displayed as histograms. **g**, Gating strategy of CD80-high, CD86-high, CD163-high, or CD206-high cells. **h**, Gating strategy of phagocytosis assay. The iMAC cells were stained with a green dye and thus they were positive in the green channel, and the tumor cells were transduced with tdTomato, and thus they were positive in the red channel. The iMAC cells undergoing phagocytosis were those showing double positive, compared with the single positive iMAC cells or tumor cells.



## Extended Data Fig. 8

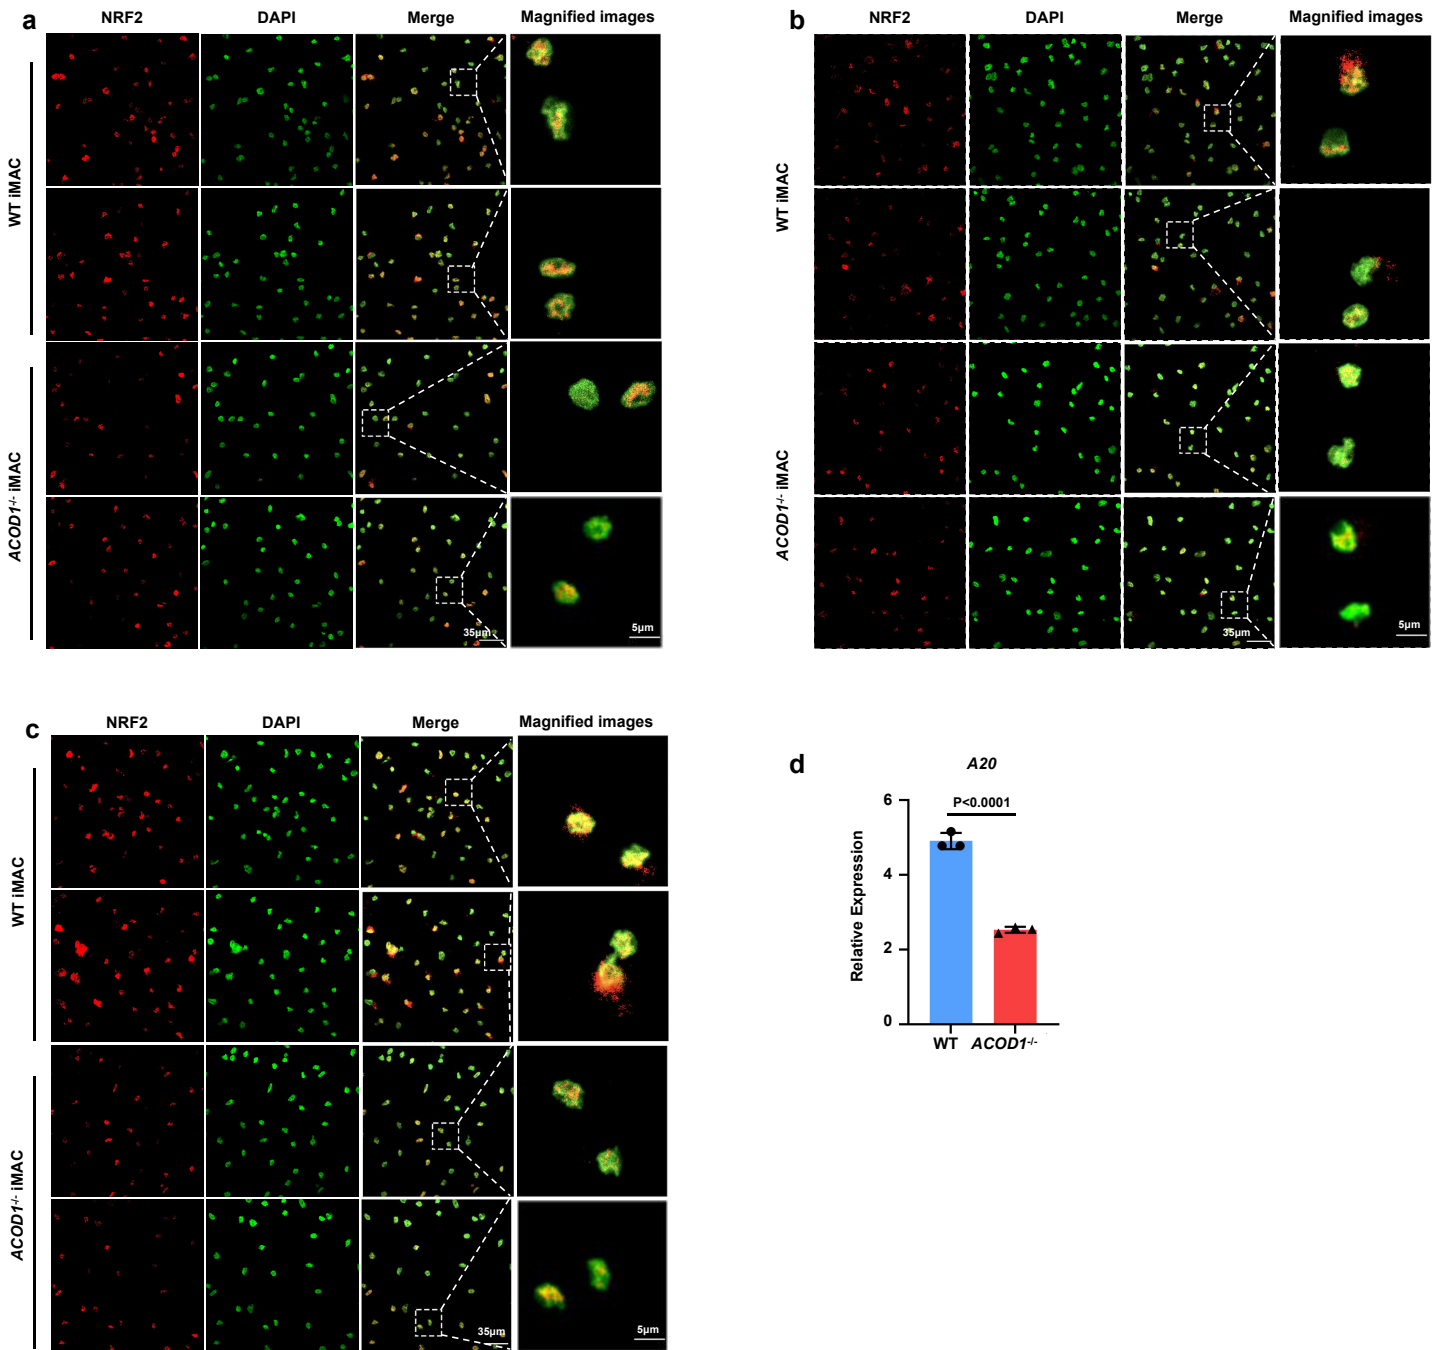

**Extended Data Fig. 8 | *ACOD1* deletion resulted in decreased nuclear expression of NRF2 and decreased expression of the NF- $\kappa$ B pathway negative regulator *TNFAIP3* (*A20*), related to Fig. 5. a-c, Representative confocal images of NRF2 in WT and *ACOD1*<sup>-/-</sup> iMACs after LPS and IFN- $\gamma$  stimulation for (a) 0 h, (b) 30 min, or (c) 8 h. d, qRT-PCR for mRNA expression of *TNFAIP3* (*A20*) in WT and *ACOD1*<sup>-/-</sup> iMACs after LPS and IFN- $\gamma$  stimulation for 24 h (n=3). Data was shown as mean  $\pm$  SD. Statistics by unpaired t test.**

## Extended Data Fig. 9

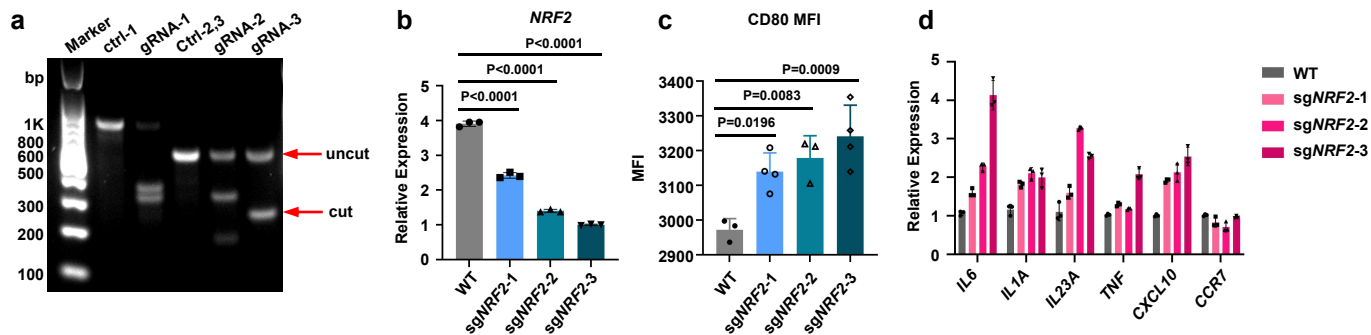

**Extended Data Fig. 9 | *NRF2* deletion promoted pro-inflammatory activation in tMACs**, related to **Fig. 5. a**, Validation of DNA cleavage efficiency by T7 endonuclease assays in THP-1 cells. **b**, qRT-PCR for mRNA expression of *NRF2* in WT and sg*NRF2*s transduced THP-1 cells (n=3). **c**, Quantification of CD80 MFI measured by flow cytometry in WT and sg*NRF2*s transduced macrophages after LPS and IFN- $\gamma$  stimulation for 24 h (WT, n=3; sg*NRF2*-1, n=4; sg*NRF2*-2, n=3; sg*NRF2*-3, n=4). **d**, qRT-PCR for mRNA expression of pro-inflammatory genes in WT and sg*NRF2*s transduced macrophages after LPS and IFN- $\gamma$  stimulation for 24 h (n=3). **b-d**, Data was shown as mean  $\pm$  SD. **b,c**, Statistics by one-way ANOVA test.

## Extended Data Fig. 10

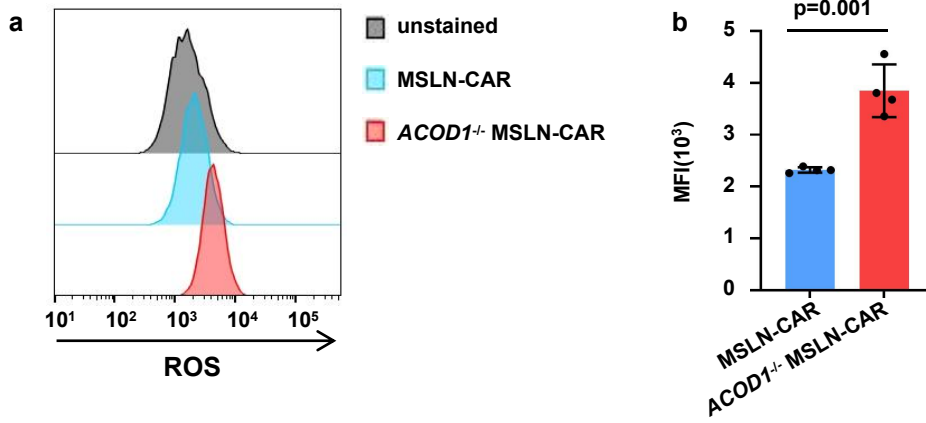

**Extended Data Fig. 10 | ACOD1 deletion promoted ROS production in iMACs**, related to **Fig. 6. a,b**, ROS in MSLN-CAR and *ACOD1*<sup>-/-</sup> MSLN-CAR iMACs (a) and mean fluorescence intensity (MFI) quantification (b) was determined by flow cytometry after stimulated by LPS plus IFN- $\gamma$  (50 ng/mL each) for 24 h which were stained by MitoSOX Red Mitochondrial Superoxide Indicator. **b**, Data were shown as mean  $\pm$  SD (n=4), Statistics by unpaired t test.

## Extended Data Fig. 11

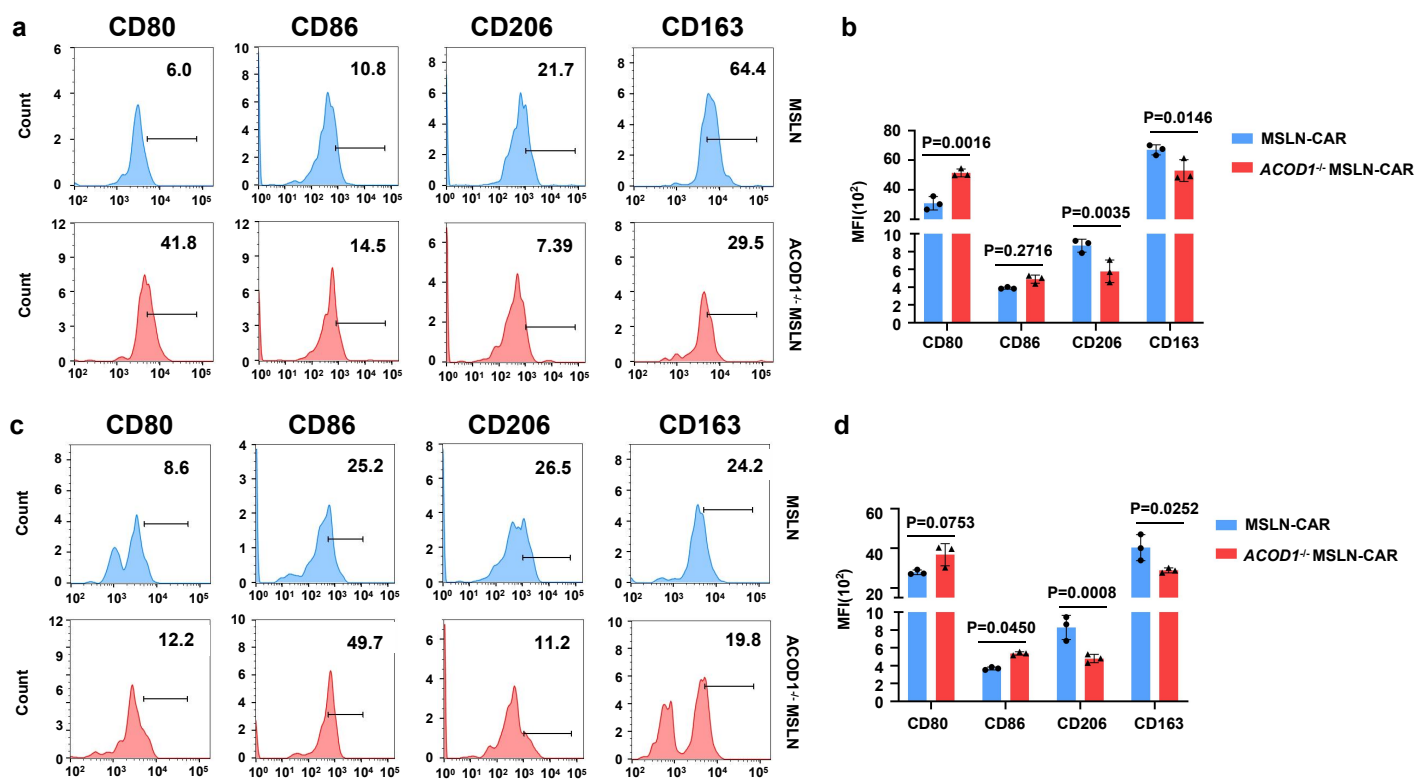

**Extended Data Fig. 11 | ACOD1 deletion promoted pro-inflammatory activity of iMACs *in vivo***, related to **Fig. 6. a,b**, Subcutaneous tumor model was established in NSG mice. 7 days later, MSLN or *ACOD1*<sup>-/-</sup> MSLN CAR-iMACs were injected intratumorally. After 7 days, the expression of CD80, CD86, CD206, and CD163 in MSLN or *ACOD1*<sup>-/-</sup> MSLN CAR-iMACs was measured by flow cytometry and the representative data was displayed as histograms (a). Data averaged from three independent experiments were shown mean  $\pm$  SD (b) (n=3). **c,d**, After 14 days, the expression of CD80, CD86, CD206, and CD163 in MSLN or *ACOD1*<sup>-/-</sup> MSLN CAR-iMACs was measured by flow cytometry and the representative data was displayed as histograms (c). Data averaged from three independent experiments were shown mean  $\pm$  SD (d) (n=3). **b,d**, Statistics by two-way ANOVA test.



## Extended Data Fig. 12

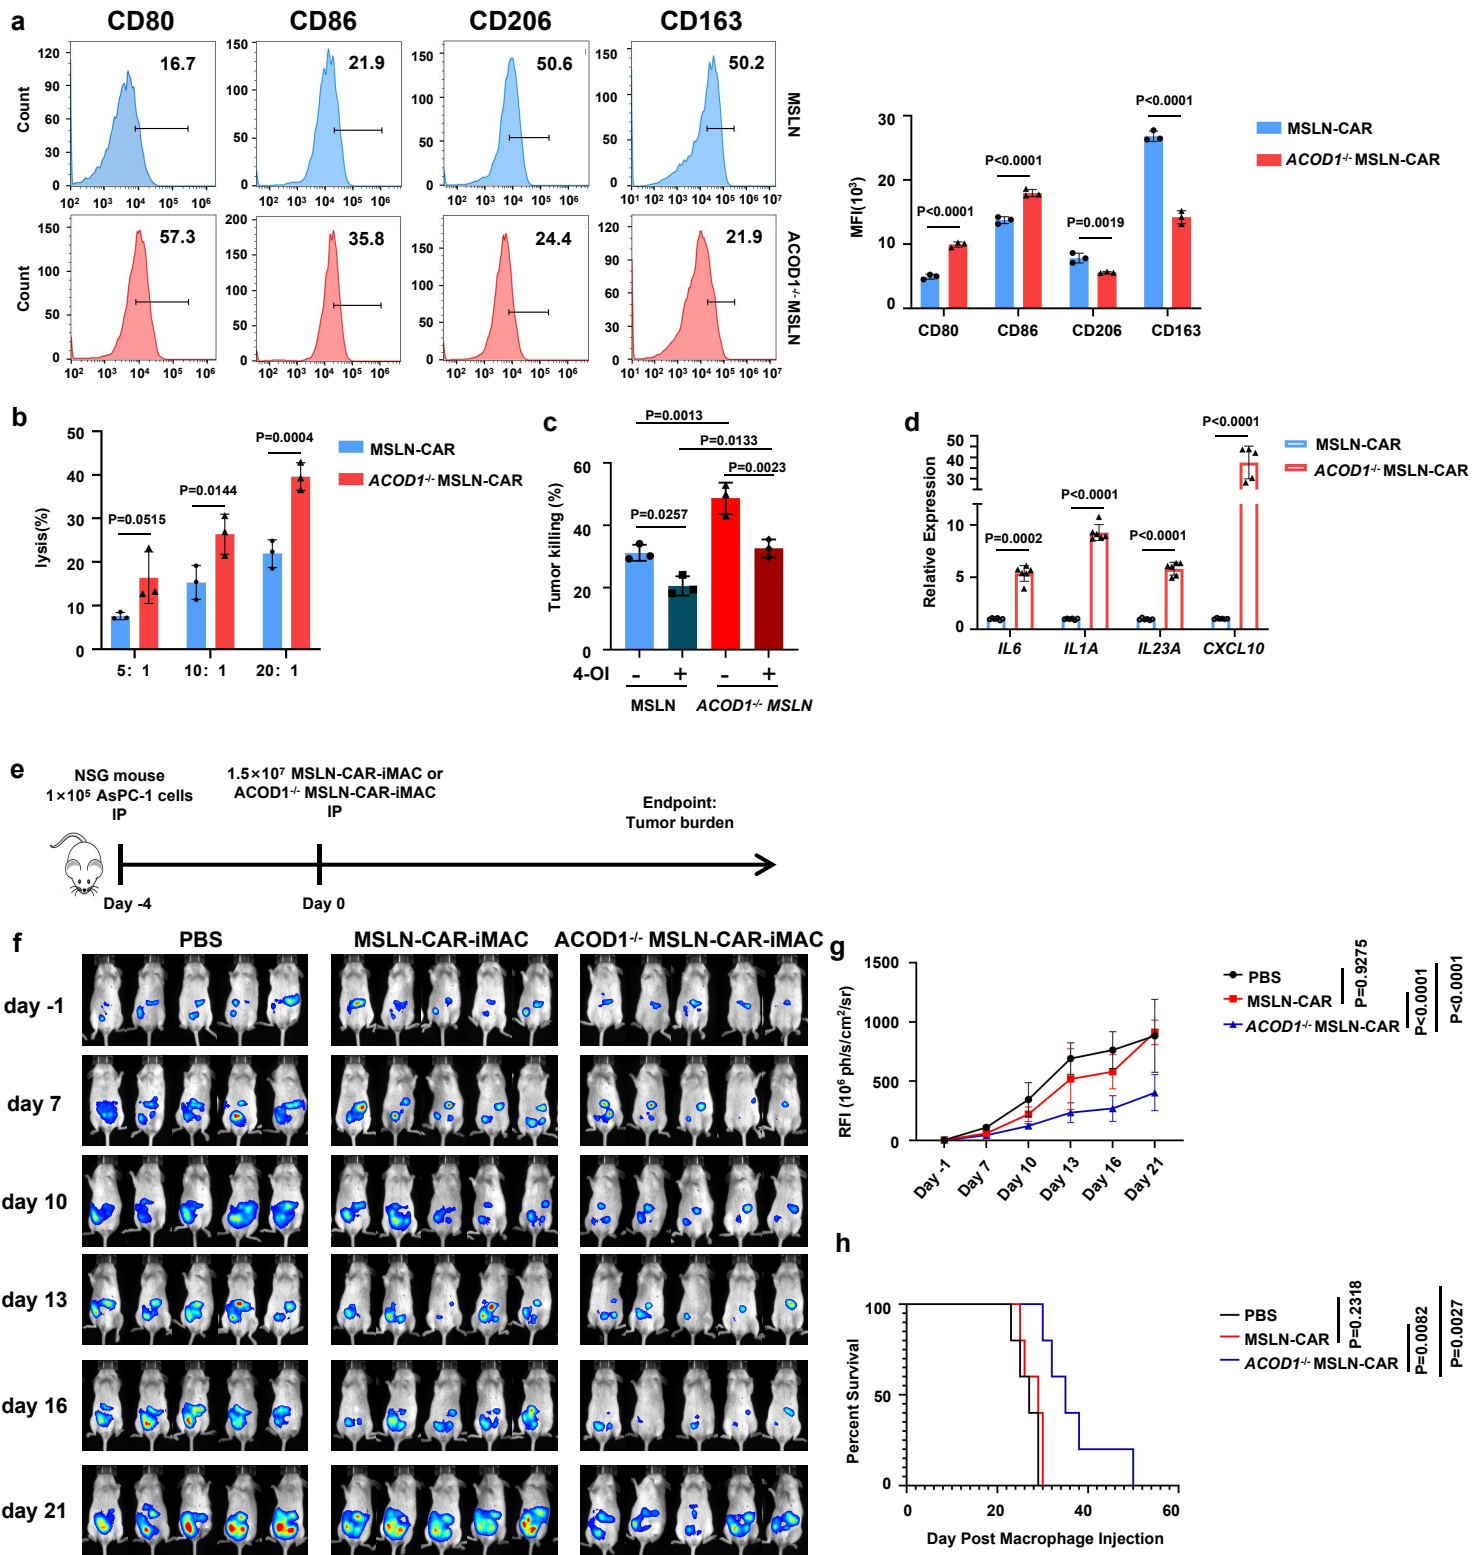

**Extended Data Fig. 12 | ACOD1 deletion promoted anti-pancreatic cancer activity of iMACs *in vitro* and *in vivo***, related to **Fig. 6**. **a**, The expression of CD80, CD86, CD206, and CD163 in MSLN or *ACOD1*<sup>-/-</sup> MSLN CAR-iMACs after co-cultured with pancreatic cancer cell AsPC-1 (E: T=5:1) for 24 h measured by flow cytometry and the representative data was displayed as histograms (left). Data averaged from three independent experiments were shown (right) (n=3). **b**, Luciferase assays for CAR-iMAC cytotoxicity activity against cancer cells when co-cultured with AsPC-1 cells for 24 h (E: T=5:1, 10:1, or 20:1) (n=3). **c**, Luciferase assays for CAR-iMAC cytotoxicity activity against cancer cells with or without 4-OI (250  $\mu$ M) addition when co-cultured with AsPC-1 cells for 24 h (E: T=10:1) (n=3). **d**, qRT-PCR for mRNA expression of pro-inflammatory genes in MSLN or *ACOD1*<sup>-/-</sup> MSLN CAR-iMACs after co-cultured with AsPC-1 cells (E: T=5:1) for 24 h (n=3). (**a-c**) Data was shown as mean  $\pm$  SD. Statistics by two-way ANOVA test. **e**, A diagram of the *in vivo* treatment scheme. **f**, IVIS images showing progression of tumor (n=5 per group). **g**, Tumor burden on day -1, 7, 10, 13, 16 and 21 was quantified and displayed as mean  $\pm$  SD. Statistics by two-way ANOVA test. **h**, The Kaplan-Meier curve demonstrating survival of the mice. Statistics by two-tailed log-rank test.

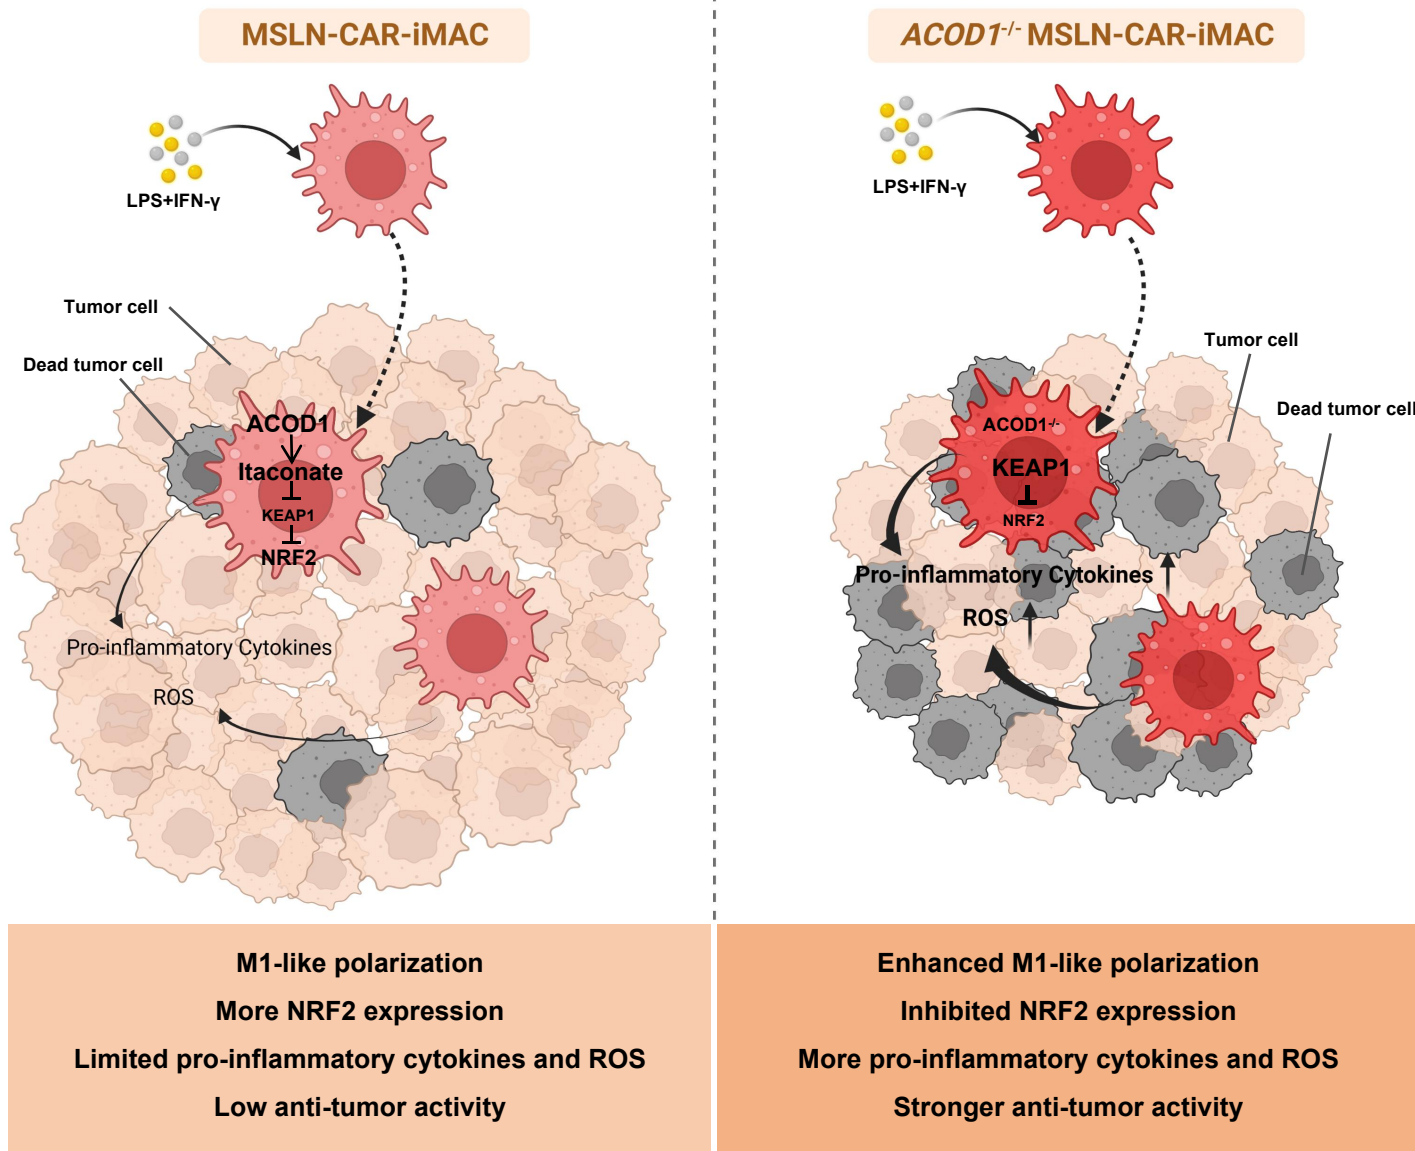

**Extended Data Fig. 13 | The diagram of ACOD1 regulating the anti-tumor effect of MSLN-CAR-iMACs.**

MSLN-CAR-iMACs and *ACOD1*<sup>-/-</sup> MSLN-CAR-iMACs were activated upon stimulation with LPS and IFN- $\gamma$ . The expression of itaconate was abrogated by ACOD1 deletion in *ACOD1*<sup>-/-</sup> MSLN-CAR-iMACs. Itaconate is known to alkylate cysteine residues on KEAP1, promoting the accumulation and nuclear translocation of NRF2, which leads to the expression of downstream genes with anti-oxidant and anti-inflammatory properties. Consequently, *ACOD1*<sup>-/-</sup> MSLN-CAR-iMACs showed lower expression of NRF2, but higher levels of pro-inflammatory cytokines and ROS. Furthermore, these cells exhibited enhanced M1-like polarization and stronger anti-tumor activity.
